# Supplementary material for: Crosstalk between AML and stromal cells triggers acetate secretion through the metabolic rewiring of stromal cells
Source: eLife journal article supplement (doi:10.7554/elife.75908), 2022-09-02
Supplement: supp [file elife-75908-supp-v2.zip]

Archive with 23 entries (23 files):
- elife_poa_e75908_Supplementary_File_1.docx
- elife_poa_e75908_Figure_1_figure_supplement_1.pdf
- elife_poa_e75908_Figure_1_figure_supplement_2.pdf
- elife_poa_e75908_Figure_2_figure_supplement_1.pdf
- elife_poa_e75908_Figure_2_figure_supplement_2.pdf
- elife_poa_e75908_Figure_2_figure_supplement_3.pdf
- elife_poa_e75908_Figure_2_figure_supplement_4.pdf
- elife_poa_e75908_Figure_2_figure_supplement_5.pdf
- elife_poa_e75908_Figure_3_figure_supplement_1.pdf
- elife_poa_e75908_Figure_4_figure_supplement_1.pdf
- elife_poa_e75908_Figure_5_figure_supplement_1.pdf
- elife_poa_e75908_Figure_1_source_data_1.xlsx
- elife_poa_e75908_Figure_2_source_data_1.xlsx
- elife_poa_e75908_Figure_3_source_data_1.xlsx
- elife_poa_e75908_Figure_4_source_data_1.xlsx
- elife_poa_e75908_Figure_5_source_data_1.xlsx
- elife_poa_e75908_Figure_1_figure_supplement_2_source_data_1.xlsx
- elife_poa_e75908_Figure_2_figure_supplement_1_source_data_1.xlsx
- elife_poa_e75908_Figure_2_figure_supplement_2_source_data_1.xlsx
- elife_poa_e75908_Figure_2_figure_supplement_5_source_data_1.xlsx
- elife_poa_e75908_Figure_3_figure_supplement_1_source_data_1.xlsx
- elife_poa_e75908_Figure_4_figure_supplement_1_source_data_1.xlsx
- elife_poa_e75908_Figure_5_figure_supplement_1_source_data_1.xlsx
