# Supplementary material for: Crosstalk between AML and stromal cells triggers acetate secretion through the metabolic rewiring of stromal cells
Source: eLife journal article supplement (doi:10.7554/elife.75908), 2022-09-02
Supplement: supp [file elife-75908-supp-v2.zip › elife_poa_e75908_Figure_1_figure_supplement_2_source_data_1.xlsx]

## Sheet: Fig 1 Supl 2a
Cell proliferation with CFSE in AML cell lines cultured alone vs in coculture
Source data									Statistics
	SKM-1 only			SKM-1 co-culture					Table Analyzed	SKM-1 Day 1		Table Analyzed	Kasumi Day 1		Table Analyzed	HL60 Day 1
0h	4599	3578	3984
Day 1	16.7	115	120	56.4	113	103			Column B	Co-culture		Column B	Co-culture		Column B	Co-culture
Day 2	64	25.9	46.3	70.4	49.5	69.7			vs.	vs,		vs.	vs,		vs.	vs,
									Column A	Only		Column A	Only		Column A	Only
	Kasumi only			Kasumi co-culture					Unpaired t test			Unpaired t test			Unpaired t test
0h	5243	1644	4208						P value	0.8643		P value	0.8594		P value	0.9173
Day 1	125	103	176	111	120	192			P value summary	ns		P value summary	ns		P value summary	ns
Day 2	102	64	85	129	74.4	96			Significantly different (P < 0.05)?	No		Significantly different (P < 0.05)?	No		Significantly different (P < 0.05)?	No
									One- or two-tailed P value?	Two-tailed		One- or two-tailed P value?	Two-tailed		One- or two-tailed P value?	Two-tailed
									t, df	t=0,1821, df=4		t, df	t=0,1889, df=4		t, df	t=0,1105, df=4
	HL-60 only			HL-60 co-culture
0h	3413	3312	3030						How big is the difference?			How big is the difference?			How big is the difference?
Day 1	197	68.4	97.1	210	36.1	95.1			Mean of column A	83.9		Mean of column A	134.7		Mean of column A	120.8
Day 2	119	9	49.2	104	40.8	46.2			Mean of column B	90.8		Mean of column B	141		Mean of column B	113.7
									Difference between means (B - A) ± SEM	6,900 ± 37,88		Difference between means (B - A) ± SEM	6,333 ± 33,53		Difference between means (B - A) ± SEM	-7,100 ± 64,23
									95% confidence interval	-98,28 to 112,1		95% confidence interval	-86,77 to 99,44		95% confidence interval	-185,4 to 171,2
									R squared (eta squared)	0.008225		R squared (eta squared)	0.008839		R squared (eta squared)	0.003045
									F test to compare variances			F test to compare variances			F test to compare variances
									F, DFn, Dfd	3,718, 2, 2		F, DFn, Dfd	1,406, 2, 2		F, DFn, Dfd	1,716, 2, 2
									P value	0.4239		P value	0.8314		P value	0.7363
									P value summary	ns		P value summary	ns		P value summary	ns
									Significantly different (P < 0.05)?	No		Significantly different (P < 0.05)?	No		Significantly different (P < 0.05)?	No
									Data analyzed			Data analyzed			Data analyzed
									Sample size, column A	3		Sample size, column A	3		Sample size, column A	3
									Sample size, column B	3		Sample size, column B	3		Sample size, column B	3
									Table Analyzed	SKM-1 Day 2		Table Analyzed	Kasumi Day 2		Table Analyzed	HL60 Day 2
									Column B	Co-culture		Column B	Co-culture		Column B	Co-culture
									vs.	vs,		vs.	vs,		vs.	vs,
									Column A	Only		Column A	Only		Column A	Only
									Unpaired t test			Unpaired t test			Unpaired t test
									P value	0.2429		P value	0.4504		P value	0.9094
									P value summary	ns		P value summary	ns		P value summary	ns
									Significantly different (P < 0.05)?	No		Significantly different (P < 0.05)?	No		Significantly different (P < 0.05)?	No
									One- or two-tailed P value?	Two-tailed		One- or two-tailed P value?	Two-tailed		One- or two-tailed P value?	Two-tailed
									t, df	t=1,369, df=4		t, df	t=0,8356, df=4		t, df	t=0,1211, df=4
									How big is the difference?			How big is the difference?			How big is the difference?
									Mean of column A	45.3		Mean of column A	83.67		Mean of column A	59.07
									Mean of column B	62.97		Mean of column B	99.8		Mean of column B	63.67
									Difference between means (B - A) ± SEM	17,67 ± 12,91		Difference between means (B - A) ± SEM	16,13 ± 19,31		Difference between means (B - A) ± SEM	4,600 ± 37,97
									95% confidence interval	-18,17 to 53,50		95% confidence interval	-37,48 to 69,74		95% confidence interval	-100,8 to 110,0
									R squared (eta squared)	0.319		R squared (eta squared)	0.1486		R squared (eta squared)	0.003656
									F test to compare variances			F test to compare variances			F test to compare variances
									F, DFn, Dfd	2,661, 2, 2		F, DFn, Dfd	2,087, 2, 2		F, DFn, Dfd	2,524, 2, 2
									P value	0.5463		P value	0.6479		P value	0.5675
									P value summary	ns		P value summary	ns		P value summary	ns
									Significantly different (P < 0.05)?	No		Significantly different (P < 0.05)?	No		Significantly different (P < 0.05)?	No
									Data analyzed			Data analyzed			Data analyzed
									Sample size, column A	3		Sample size, column A	3		Sample size, column A	3
									Sample size, column B	3		Sample size, column B	3		Sample size, column B	3

## Sheet: Fig 1 Supl 2b
Extracellular acetate in SKM-1 cocultured with HeLa cells
Source data												Statistics
	SKM-1 only			HeLa only			Co-culture					Table Analyzed	Copy of Norm Extracellular acetate (HeLa)
0 h	142787	104190		142787	104190		142787	104190
20 h	121946	126848	213531	134782	144900	114195	138540	150215	158187			Column C	Co-culture
24 h	160619	137796	273638	148375	140502	127468	155056	151832	174229			vs.	vs,
												Column A	SKM-1 only
												Unpaired t test
												P value	0.5158
												P value summary	ns
												Significantly different (P < 0.05)?	No
												One- or two-tailed P value?	Two-tailed
												t, df	t=0,7120, df=4
												How big is the difference?
												Mean of column A	1.544
												Mean of column C	1.299
												Difference between means (C - A) ± SEM	-0,2455 ± 0,3448
												95% confidence interval	-1,203 to 0,7118
												R squared (eta squared)	0.1125
												F test to compare variances
												F, DFn, Dfd	36,09, 2, 2
												P value	0.0539
												P value summary	ns
												Significantly different (P < 0.05)?	No
												Data analyzed
												Sample size, column A	3
												Sample size, column C	3
												Table Analyzed	Copy of Norm Extracellular acetate (HeLa)
												Column C	Co-culture
												vs.	vs,
												Column B	HeLa only
												Unpaired t test
												P value	0.0805
												P value summary	ns
												Significantly different (P < 0.05)?	No
												One- or two-tailed P value?	Two-tailed
												t, df	t=2,328, df=4
												How big is the difference?
												Mean of column B	1.124
												Mean of column C	1.299
												Difference between means (C - B) ± SEM	0,1748 ± 0,07511
												95% confidence interval	-0,03370 to 0,3834
												R squared (eta squared)	0.5753
												F test to compare variances
												F, DFn, Dfd	1,315, 2, 2
												P value	0.864
												P value summary	ns
												Significantly different (P < 0.05)?	No
												Data analyzed
												Sample size, column B	3
												Sample size, column C	3
