# Supplementary material for: Crosstalk between AML and stromal cells triggers acetate secretion through the metabolic rewiring of stromal cells
Source: eLife journal article supplement (doi:10.7554/elife.75908), 2022-09-02
Supplement: supp [file elife-75908-supp-v2.zip › elife_poa_e75908_Figure_1_source_data_1.xlsx]

## Sheet: Fig 1b
Co-cultures in direct contact
Source data											Statistics
	SKM-1 only			MS-5 only			Co-culture
0 h	0.682131	0.765805	1.55206	0.682131	0.765805	1.55206	0.682131	0.765805	1.55206		Table Analyzed	24h Norm Extracellular acetate (SKM-1)			Table Analyzed	24h Norm Extracellular acetate (Kasumi)			Table Analyzed	24h Norm Extracellular acetate (HL-60)
20 h	0.699938	0.706394	0.64859	6.68596	11.8404	10.1423	14.5301	20.8376	18.8172
24 h	0.685538	0.739564	0.649998	8.7367	14.9298	11.9826	19.1572	27.5292	25.745		Column C	Co-culture			Column C	Co-culture			Column C	Co-culture
											vs.	vs,			vs.	vs,			vs.	vs,
											Column A	SKM-1 only			Column A	Kasumi only			Column A	HL-60 only
	Kasumi only			MS-5 only			Co-culture
0 h	0.00159013	1.18647	1.81194	0.00159013	1.18647	1.81194	0.00159013	1.18647	1.81194		Unpaired t test				Unpaired t test				Unpaired t test
20 h	0.657722	0.802282	1.41201	8.62457	9.59075	6.89873	11.4665	11.9035	10.6222		P value	0.0008			P value	<0,0001			P value	<0,0001
24 h	0.80399	1.15188	1.0467	11.2416	11.6528	8.682	13.7551	12.5204	14.6369		P value summary	***			P value summary	****			P value summary	****
											Significantly different (P < 0.05)?	Yes			Significantly different (P < 0.05)?	Yes			Significantly different (P < 0.05)?	Yes
											One- or two-tailed P value?	Two-tailed			One- or two-tailed P value?	Two-tailed			One- or two-tailed P value?	Two-tailed
	HL-60 only			MS-5 only			Co-culture				t, df	t=9,211, df=4			t, df	t=20,30, df=4			t, df	t=33,42, df=4
0 h	0.00159013	1.18647	1.81194	0.00159013	1.18647	1.81194	0.00159013	1.18647	1.81194
20 h	0.955237	0.731311	1.73086	12.3379	9.9615	7.09954	20.1158	15.0169	17.431		How big is the difference?				How big is the difference?				How big is the difference?
24 h	1.16972	1.20416	1.37033	13.6422	11.7415	8.99397	22.5698	20.5341	21.1783		Mean of column A	0.6917			Mean of column A	1.001			Mean of column A	1.248
											Mean of column C	24.14			Mean of column C	13.64			Mean of column C	21.43
											Difference between means (C - A) ± SEM	23,45 ± 2,546			Difference between means (C - A) ± SEM	12,64 ± 0,6224			Difference between means (C - A) ± SEM	20,18 ± 0,6039
											95% confidence interval	16,38 to 30,52			95% confidence interval	10,91 to 14,36			95% confidence interval	18,50 to 21,86
											R squared (eta squared)	0.955			R squared (eta squared)	0.9904			R squared (eta squared)	0.9964
											F test to compare variances				F test to compare variances				F test to compare variances
											F, DFn, Dfd	9560, 2, 2			F, DFn, Dfd	35,51, 2, 2			F, DFn, Dfd	94,08, 2, 2
											P value	0.0002			P value	0.0548			P value	0.021
											P value summary	***			P value summary	ns			P value summary	*
											Significantly different (P < 0.05)?	Yes			Significantly different (P < 0.05)?	No			Significantly different (P < 0.05)?	Yes
											Data analyzed				Data analyzed				Data analyzed
											Sample size, column A	3			Sample size, column A	3			Sample size, column A	3
											Sample size, column C	3			Sample size, column C	3			Sample size, column C	3
											Table Analyzed	24h Norm Extracellular acetate (SKM-1)			Table Analyzed	24h Norm Extracellular acetate (Kasumi)			Table Analyzed	24h Norm Extracellular acetate (HL-60)
											Column C	Co-culture			Column C	Co-culture			Column C	Co-culture
											vs.	vs,			vs.	vs,			vs.	vs,
											Column B	MS-5 only			Column B	MS-5 only			Column B	MS-5 only
											Unpaired t test				Unpaired t test				Unpaired t test
											P value	0.017			P value	0.0491			P value	0.0025
											P value summary	*			P value summary	*			P value summary	**
											Significantly different (P < 0.05)?	Yes			Significantly different (P < 0.05)?	Yes			Significantly different (P < 0.05)?	Yes
											One- or two-tailed P value?	Two-tailed			One- or two-tailed P value?	Two-tailed			One- or two-tailed P value?	Two-tailed
											t, df	t=3,941, df=4			t, df	t=2,794, df=4			t, df	t=6,749, df=4
											How big is the difference?				How big is the difference?				How big is the difference?
											Mean of column B	11.88			Mean of column B	10.53			Mean of column B	11.46
											Mean of column C	24.14			Mean of column C	13.64			Mean of column C	21.43
											Difference between means (C - B) ± SEM	12,26 ± 3,111			Difference between means (C - B) ± SEM	3,112 ± 1,114			Difference between means (C - B) ± SEM	9,968 ± 1,477
											95% confidence interval	3,622 to 20,90			95% confidence interval	0,01974 to 6,204			95% confidence interval	5,868 to 14,07
											R squared (eta squared)	0.7952			R squared (eta squared)	0.6612			R squared (eta squared)	0.9193
											F test to compare variances				F test to compare variances				F test to compare variances
											F, DFn, Dfd	2,026, 2, 2			F, DFn, Dfd	2,292, 2, 2			F, DFn, Dfd	5,045, 2, 2
											P value	0.6608			P value	0.6075			P value	0.3308
											P value summary	ns			P value summary	ns			P value summary	ns
											Significantly different (P < 0.05)?	No			Significantly different (P < 0.05)?	No			Significantly different (P < 0.05)?	No
											Data analyzed				Data analyzed				Data analyzed
											Sample size, column B	3			Sample size, column B	3			Sample size, column B	3
											Sample size, column C	3			Sample size, column C	3			Sample size, column C	3

## Sheet: Fig 1c
Co-cultures permeable membrane
Source data											Statistics
	SKM-1 only			MS-5 only			Co-culture p. m.
0 h	0.985129	0.975965	1.03891	0.985129	0.975965	1.03891	0.985129	0.975965	1.03891		Table Analyzed	24h Norm Extracellular acetate (SKM-1) permeable membrane			Table Analyzed	24h Norm Extracellular acetate (Kasumi) permeable membrane			Table Analyzed	24h Norm Extracellular acetate (HL-60) permeable membrane
20 h	0.733604	0.71185	0.665956	14.3868	7.89103	9.40974	8.17937	6.7467	6.57738
24 h	0.712101	0.682849	0.624618	15.4117	10.9028	12.6994	10.9997	3.60197	8.27523		Column C	Co-culture p, m,			Column C	Co-culture p, m,			Column C	Co-culture p, m,
											vs.	vs,			vs.	vs,			vs.	vs,
											Column A	SKM-1 only			Column A	Kasumi only			Column A	HL60 only
	Kasumi only			MS-5 only			Co-culture p. m.
0 h	0.684723	1.36906	0.946221	0.684723	1.36906	0.946221	0.684723	1.36906	0.946221		Unpaired t test				Unpaired t test				Unpaired t test
20 h	0.793763	0.661742	0.658477	9.37928	9.37921	6.24092	2.0104	3.24751	3.02445		P value	0.0323			P value	0.0086			P value	0.01
24 h	0.914321	0.74856	0.662866	8.6238	10.4585	6.85865	2.45189	4.27351	4.14534		P value summary	*			P value summary	**			P value summary	**
											Significantly different (P < 0.05)?	Yes			Significantly different (P < 0.05)?	Yes			Significantly different (P < 0.05)?	Yes
											One- or two-tailed P value?	Two-tailed			One- or two-tailed P value?	Two-tailed			One- or two-tailed P value?	Two-tailed
	HL-60 only			MS-5 only			Co-culture p. m.				t, df	t=3,218, df=4			t, df	t=4,814, df=4			t, df	t=4,609, df=4
0 h	0.684723	1.36906	0.946221	0.684723	1.36906	0.946221	0.684723	1.36906	0.946221
20 h	0.770633	0.867924	0.92878	8.84018	7.31619	6.41336	2.47268	4.30434	3.59195		How big is the difference?				How big is the difference?				How big is the difference?
24 h	0.695588	0.845479	0.89227	11.6131	9.77169	9.59601	2.64123	4.91184	4.32581		Mean of column A	0.6732			Mean of column A	0.7752			Mean of column A	0.8111
											Mean of column C	7.626			Mean of column C	3.624			Mean of column C	3.96
											Difference between means (C - A) ± SEM	6,952 ± 2,160			Difference between means (C - A) ± SEM	2,848 ± 0,5916			Difference between means (C - A) ± SEM	3,149 ± 0,6831
											95% confidence interval	0,9546 to 12,95			95% confidence interval	1,206 to 4,491			95% confidence interval	1,252 to 5,045
											R squared (eta squared)	0.7214			R squared (eta squared)	0.8528			R squared (eta squared)	0.8415
											F test to compare variances				F test to compare variances				F test to compare variances
											F, DFn, Dfd	7058, 2, 2			F, DFn, Dfd	63,26, 2, 2			F, DFn, Dfd	131,6, 2, 2
											P value	0.0003			P value	0.0311			P value	0.0151
											P value summary	***			P value summary	*			P value summary	*
											Significantly different (P < 0.05)?	Yes			Significantly different (P < 0.05)?	Yes			Significantly different (P < 0.05)?	Yes
											Data analyzed				Data analyzed				Data analyzed
											Sample size, column A	3			Sample size, column A	3			Sample size, column A	3
											Sample size, column C	3			Sample size, column C	3			Sample size, column C	3
											Table Analyzed	24h Norm Extracellular acetate (SKM-1) permeable membrane
															Table Analyzed	24h Norm Extracellular acetate (Kasumi) permeable membrane			Table Analyzed	24h Norm Extracellular acetate (HL-60) permeable membrane
											Column C	Co-culture p, m,
											vs.	vs,			Column C	Co-culture p, m,			Column C	Co-culture p, m,
											Column B	MS-5 only			vs.	vs,			vs.	vs,
															Column B	MS-5 only			Column B	MS-5 only
											Unpaired t test
											P value	0.1003			Unpaired t test				Unpaired t test
											P value summary	ns			P value	0.0136			P value	0.0025
											Significantly different (P < 0.05)?	No			P value summary	*			P value summary	**
											One- or two-tailed P value?	Two-tailed			Significantly different (P < 0.05)?	Yes			Significantly different (P < 0.05)?	Yes
											t, df	t=2,129, df=4			One- or two-tailed P value?	Two-tailed			One- or two-tailed P value?	Two-tailed
															t, df	t=4,209, df=4			t, df	t=6,790, df=4
											How big is the difference?
											Mean of column B	13			How big is the difference?				How big is the difference?
											Mean of column C	7.626			Mean of column B	8.647			Mean of column B	10.33
											Difference between means (C - B) ± SEM	-5,379 ± 2,527			Mean of column C	3.624			Mean of column C	3.96
											95% confidence interval	-12,39 to 1,636			Difference between means (C - B) ± SEM	-5,023 ± 1,194			Difference between means (C - B) ± SEM	-6,367 ± 0,9377
											R squared (eta squared)	0.5312			95% confidence interval	-8,337 to -1,710			95% confidence interval	-8,971 to -3,764
															R squared (eta squared)	0.8158			R squared (eta squared)	0.9202
											F test to compare variances
											F, DFn, Dfd	2,717, 2, 2			F test to compare variances				F test to compare variances
											P value	0.5381			F, DFn, Dfd	3,134, 2, 2			F, DFn, Dfd	1,113, 2, 2
											P value summary	ns			P value	0.4838			P value	0.9465
											Significantly different (P < 0.05)?	No			P value summary	ns			P value summary	ns
															Significantly different (P < 0.05)?	No			Significantly different (P < 0.05)?	No
											Data analyzed
											Sample size, column B	3			Data analyzed				Data analyzed
											Sample size, column C	3			Sample size, column B	3			Sample size, column B	3
															Sample size, column C	3			Sample size, column C	3

## Sheet: Fig 1d
Co-cultures with separation over 48h
Source data											Statistics
	Co-culture			SKM-1 only			MS-5 only
0h	0.99834	0.98941	1.01225								Table Analyzed	Stats Norm Extracellular acetate in co-culture (SKM-1)			Table Analyzed	Stats Norm Extracellular acetate in co-culture (Kasumi1)			Table Analyzed	Stats Norm Extracellular acetate in co-culture (HL-60)
24h	26.5398	28.7953	27.7373	26.5398	28.7953	27.7373	26.5398	28.7953	27.7373
48h				30.3757	31.6992	28.9998	62.6499	42.9769	57.2174		Column B	SKM-1 after co-culture			Column B	Kasumi after co-culture			Column B	HL-60 after co-culture
											vs.	vs,			vs.	vs,			vs.	vs,
	Co-culture			Kasumi only			MS-5 only				Column A	Co-culture 24h			Column A	Co-culture 24h			Column A	Co-culture 24h
0h	0.99834	0.98941	1.01225
24h	15.1527	16.7333	12.0185	15.1527	16.7333	12.0185	15.1527	16.7333	12.0185		Unpaired t test				Unpaired t test				Unpaired t test
48h				17.1377	13.0519	9.04027	31.2834	41.2582	28.5507		P value	0.0006			P value	0.597			P value	0.4828
											P value summary	***			P value summary	ns			P value summary	ns
	Co-culture			HL-60 only			MS-5 only				Significantly different (P < 0.05)?	Yes			Significantly different (P < 0.05)?	No			Significantly different (P < 0.05)?	No
0h	0.99834	0.98941	1.01225								One- or two-tailed P value?	Two-tailed			One- or two-tailed P value?	Two-tailed			One- or two-tailed P value?	Two-tailed
24h	24.9224	27.2094	16.2176	24.9224	27.2094	16.2176	24.9224	27.2094	16.2176		t, df	t=9,892, df=4			t, df	t=0,5734, df=4			t, df	t=0,7728, df=4
48h				32.1346	32.1778	17.6641	70.9922	72.9424	61.4277
											How big is the difference?				How big is the difference?				How big is the difference?
											Mean of column A	14.63			Mean of column A	14.63			Mean of column A	22.78
											Mean of column B	30.36			Mean of column B	13.08			Mean of column B	27.33
											Difference between means (B - A) ± SEM	15,72 ± 1,590			Difference between means (B - A) ± SEM	-1,558 ± 2,717			Difference between means (B - A) ± SEM	4,542 ± 5,878
											95% confidence interval	11,31 to 20,14			95% confidence interval	-9,103 to 5,986			95% confidence interval	-11,78 to 20,86
											R squared (eta squared)	0.9607			R squared (eta squared)	0.07596			R squared (eta squared)	0.1299
											F test to compare variances				F test to compare variances				F test to compare variances
											F, DFn, Dfd	3,161, 2, 2			F, DFn, Dfd	2,847, 2, 2			F, DFn, Dfd	2,081, 2, 2
											P value	0.4807			P value	0.5199			P value	0.6491
											P value summary	ns			P value summary	ns			P value summary	ns
											Significantly different (P < 0.05)?	No			Significantly different (P < 0.05)?	No			Significantly different (P < 0.05)?	No
											Data analyzed				Data analyzed				Data analyzed
											Sample size, column A	3			Sample size, column A	3			Sample size, column A	3
											Sample size, column B	3			Sample size, column B	3			Sample size, column B	3
											Table Analyzed	Stats Norm Extracellular acetate in co-culture (SKM-1)			Table Analyzed	Stats Norm Extracellular acetate in co-culture (Kasumi1)			Table Analyzed	Stats Norm Extracellular acetate in co-culture (HL-60)
											Column C	MS-5 after co-culture			Column C	MS-5 after co-culture			Column C	MS-5 after co-culture
											vs.	vs,			vs.	vs,			vs.	vs,
											Column A	Co-culture 24h			Column A	Co-culture 24h			Column A	Co-culture 24h
											Unpaired t test				Unpaired t test				Unpaired t test
											P value	0.0028			P value	0.0097			P value	0.0015
											P value summary	**			P value summary	**			P value summary	**
											Significantly different (P < 0.05)?	Yes			Significantly different (P < 0.05)?	Yes			Significantly different (P < 0.05)?	Yes
											One- or two-tailed P value?	Two-tailed			One- or two-tailed P value?	Two-tailed			One- or two-tailed P value?	Two-tailed
											t, df	t=6,578, df=4			t, df	t=4,646, df=4			t, df	t=11,22, df=3
											How big is the difference?				How big is the difference?				How big is the difference?
											Mean of column A	14.63			Mean of column A	14.63			Mean of column A	22.78
											Mean of column C	54.28			Mean of column C	33.7			Mean of column C	71.97
											Difference between means (C - A) ± SEM	39,65 ± 6,027			Difference between means (C - A) ± SEM	19,06 ± 4,103			Difference between means (C - A) ± SEM	49,18 ± 4,384
											95% confidence interval	22,91 to 56,38			95% confidence interval	7,671 to 30,45			95% confidence interval	35,23 to 63,13
											R squared (eta squared)	0.9154			R squared (eta squared)	0.8437			R squared (eta squared)	0.9767
											F test to compare variances				F test to compare variances				F test to compare variances
											F, DFn, Dfd	17,93, 2, 2			F, DFn, Dfd	7,770, 2, 2			F, DFn, Dfd
											P value	0.1057			P value	0.2281			P value
											P value summary	ns			P value summary	ns			P value summary
											Significantly different (P < 0.05)?	No			Significantly different (P < 0.05)?	No			Significantly different (P < 0.05)?
											Data analyzed				Data analyzed				Data analyzed
											Sample size, column A	3			Sample size, column A	3			Sample size, column A	3
											Sample size, column C	3			Sample size, column C	3			Sample size, column C	2

## Sheet: Fig 1e
Co-cultures with primary AML cells
Source data
	AML1	AML2	AML3	AML4
MS-5 only	1.44327	2.18943	3.74031	3.37641
Co-culture	1.3683	2.6753	4.76859	3.65189

## Sheet: Fig 1f
Co-cultures with healthy donor CD34+ cells
Source data
	Healthy1	Healthy2	Healthy3
MS-5 only	1.58301	1.96276	1.54527
Co-culture	1.13157	1.78674	1.42964

## Sheet: Fig 1g
BMEF from control and MLL-AF9 mice
Source data											Statistics
	Acetate										Table Analyzed	Acetate norm MLL-AF9 vs control
Control	1.12268e+07	1.07957e+07	7.76417e+06
MLL-AF9	1.4695e+07	2.83563e+07	1.74655e+07	1.26059e+07	1.88766e+07						Column B	MLL-AF9
											vs.	vs,
											Column A	Control
											Mann Whitney test
											P value	0.0357
											Exact or approximate P value?	Exact
											P value summary	*
											Significantly different (P < 0.05)?	Yes
											One- or two-tailed P value?	Two-tailed
											Sum of ranks in column A,B	6 , 30
											Mann-Whitney U	0
											Difference between medians
											Median of column A	10795711, n=3
											Median of column B	17465460, n=5
											Difference: Actual	6669749
											Difference: Hodges-Lehmann	6930808
