# Supplementary material for: Crosstalk between AML and stromal cells triggers acetate secretion through the metabolic rewiring of stromal cells
Source: eLife journal article supplement (doi:10.7554/elife.75908), 2022-09-02
Supplement: supp [file elife-75908-supp-v2.zip › elife_poa_e75908_Figure_2_figure_supplement_1_source_data_1.xlsx]

## Sheet: Fig 2 Supl 1a
Acetate titration in co-culture
Source data							Statistics
		Acetate intensity						Acetate in co-culture
Medium + acetate (mM)	0	134596	210567	294139			Best-fit values
	0.25	618770	546169	503125			Slope	1379666
	1	1.81953e+06	1.54799e+06	1.57205e+06			Y-intercept	227406
	4	5.75435e+06	5.6802e+06	5.77713e+06			X-intercept	-0.1648
Co-culture 24h		3.68165e+06	5.01668e+06	4.78101e+06			1/slope	7.248e-07
							Std. Error
							Slope	15803
							Y-intercept	32638
							95% Confidence Intervals
Y = 1379666*X + 227406							Slope	1344456 to 1414877
							Y-intercept	154684 to 300128
							X-intercept	-0,2213 to -0,1103
							Goodness of Fit
							R square	0.9987
							Sy.x	87296
							Is slope significantly non-zero?
							F	7622
							DFn, DFd	1, 10
							P value	<0,0001
							Deviation from zero?	Significant
							Equation	Y = 1379666*X + 227406
							Data
							Number of X values	12
							Maximum number of Y replicates	3
							Total number of values	12
							Number of missing values	0

## Sheet: Fig 2 Supl 1b
Acetate consumption in SKM-1
Source data											Statistics
	SKM-1 0.25mM acetate					SKM-1 3mM acetate					Table Analyzed	Copy of Norm SKM-1 in 0,25mM acetate		Table Analyzed	Copy of Norm SKM-1 in 3mM acetate
0 h	0.930484	0.992023	1.07749		0 h	1.00409	1.01897	0.976935
24 h	0.803669	0.709668	0.710401		24 h	0.895717	0.994289	0.966985			Column B	24 h		Column B	24 h
48 h	0.537792	0.456182	0.478703		48 h	0.900309	0.877365	0.836187			vs.	vs,		vs.	vs,
											Column A	0 h		Column A	0 h
											Unpaired t test			Unpaired t test
											P value	0.0081		P value	0.2089
											P value summary	**		P value summary	ns
											Significantly different (P < 0.05)?	Yes		Significantly different (P < 0.05)?	No
											One- or two-tailed P value?	Two-tailed		One- or two-tailed P value?	Two-tailed
											t, df	t=4,898, df=4		t, df	t=1,496, df=4
											How big is the difference?			How big is the difference?
											Mean of column A	1		Mean of column A	1
											Mean of column B	0.7412		Mean of column B	0.9523
											Difference between means (B - A) ± SEM	-0,2588 ± 0,05283		Difference between means (B - A) ± SEM	-0,04767 ± 0,03186
											95% confidence interval	-0,4054 to -0,1121		95% confidence interval	-0,1361 to 0,04078
											R squared (eta squared)	0.8571		R squared (eta squared)	0.3589
											F test to compare variances			F test to compare variances
											F, DFn, Dfd	1,865, 2, 2		F, DFn, Dfd	5,701, 2, 2
											P value	0.6981		P value	0.2985
											P value summary	ns		P value summary	ns
											Significantly different (P < 0.05)?	No		Significantly different (P < 0.05)?	No
											Data analyzed			Data analyzed
											Sample size, column A	3		Sample size, column A	3
											Sample size, column B	3		Sample size, column B	3
											Table Analyzed	Copy of Norm SKM-1 in 0,25mM acetate		Table Analyzed	Copy of Norm SKM-1 in 3mM acetate
											Column C	48 h		Column C	48 h
											vs.	vs,		vs.	vs,
											Column A	0 h		Column A	0 h
											Unpaired t test			Unpaired t test
											P value	0.0005		P value	0.0046
											P value summary	***		P value summary	**
											Significantly different (P < 0.05)?	Yes		Significantly different (P < 0.05)?	Yes
											One- or two-tailed P value?	Two-tailed		One- or two-tailed P value?	Two-tailed
											t, df	t=10,37, df=4		t, df	t=5,737, df=4
											How big is the difference?			How big is the difference?
											Mean of column A	1		Mean of column A	1
											Mean of column C	0.4909		Mean of column C	0.8713
											Difference between means (C - A) ± SEM	-0,5091 ± 0,04908		Difference between means (C - A) ± SEM	-0,1287 ± 0,02243
											95% confidence interval	-0,6454 to -0,3728		95% confidence interval	-0,1910 to -0,06642
											R squared (eta squared)	0.9642		R squared (eta squared)	0.8916
											F test to compare variances			F test to compare variances
											F, DFn, Dfd	3,068, 2, 2		F, DFn, Dfd	2,323, 2, 2
											P value	0.4916		P value	0.6018
											P value summary	ns		P value summary	ns
											Significantly different (P < 0.05)?	No		Significantly different (P < 0.05)?	No
											Data analyzed			Data analyzed
											Sample size, column A	3		Sample size, column A	3
											Sample size, column C	3		Sample size, column C	3
