# Supplementary material for: Crosstalk between AML and stromal cells triggers acetate secretion through the metabolic rewiring of stromal cells
Source: eLife journal article supplement (doi:10.7554/elife.75908), 2022-09-02
Supplement: supp [file elife-75908-supp-v2.zip › elife_poa_e75908_Figure_2_figure_supplement_2_source_data_1.xlsx]

## Sheet: Fig 2 Supl 2b
Label incorporation from acetate in coculture 30min incubation									Label incorporation from acetate in coculture 8h incubation
Source data									Source data
	Kasumi 30min			MS5 (Kasumi) 30min						Kasumi-1 co-culture			MS-5 co-culture
Acetate C2	19.8203	20.1928	20.7883	1.1056					Acetate C2	18.7388	18.4158	19.1427	0.94795
Aspartate C2	14.8145	9.17801	8.14375	2.3759					Aspartate C2	35.4478	18.9248	11.5465	3.79145
Aspartate C3	16.1318	8.01359	10.207	2.03727					Aspartate C3	21.7819	27.0186	17.2544	2.9632
Acetylaspartate C6	2.87983	1.41217	1.60066	2.31514					Acetylaspartate C6	12.6463	12.7362	11.0428	n.d.
Acetylcarnitine C9	28.4523	18.0381	23.9505	n.d.					Glutamate C2	17.52	15.0152	11.7465	2.33329
Citrate C2	16.3171	9.3231	12.2919	n.d.					Glutamate C3	15.7895	16.8332	11.6598	2.40427
Fumarate C2	3.18272	2.5647	1.50527	n.d.					Glutamate C4	39.1256	48.3443	26.4856	3.99931
Glutamate C2	6.48191	4.25729	3.46532	1.38787					Glutamine C4	6.83563	5.24654	10.5381	1.1
Glutamate C3	3.93547	3.41597	3.53086	1.47193					Glutathione C4	12.9113	12.3398	10.847	1.90316
Glutamate C4	22.2507	14.2058	17.4788	1.89095					Proline C4	3.46709	3.11957	4.83005	n.d.
Glutamine C4	3.351	3.4522	2.73782	n.d.
Oxoglutarate C4	1.42068	1.01907	0.84169	n.d.
Glutathione C4	1.86691	1.72878	1.18759	1.64584
Malate C2	9.17476	12.0402	7.22771	n.d.
Malate C3	8.62307	6.2723	6.34108	1.40281
Proline C4	2.8522	3.24708	4.29664	n.d.
Succinate C2/C3	14.1825	10.3386	10.1159	1.09783

## Sheet: Fig 2 Supl 2c
Label incorporation from acetate in coculture 30min incubation									Label incorporation from acetate in coculture 8h incubation
Source data									Source data
	HL60 30min			MS5 (HL-60) 30min						HL-60 co-culture			MS-5 co-culture
Acetate C2	7.72682	5.37709	14.6869	1.37746					Acetate C2	66.7251	42.2581	51.7122	2.55939
Aspartate C2	1.1	1.1	1.1	1.06985					Aspartate C3	1.75476	1.37127	1.31171	1.27772
Aspartate C3	1.1	1.66341	1.1	1.04432					Acetylcarnitine C9	5.51743	5.15039	3.17553	n.d.
Acetylaspartate C6	1.49551	1.55273	1.71327	1.86194					Acetylaspartate C6	8.06725	6.53382	4.28412	1.99143
Citrate C2	1.1	8.89767	7.45955	n.d.					Glutamate C2	5.46446	7.31468	5.42668	1.3267
Fumarate C2	1.1	1.1	1.1	n.d.					Glutamate C3	4.68839	7.27522	4.66716	1.72995
Glutamate C2	1.43098	1.83571	2.33524	0.923463					Glutamate C4	13.8644	16.1017	11.2575	1.54819
Glutamate C3	1.40735	1.87879	2.14852	1.00651					Glutathione C4	3.85683	5.75204	4.40677	1.37199
Glutamate C4	4.65769	4.75912	6.40907	1.35464					Proline C4	7.48737	8.28318	7.9547	1.23637
Glutamine C4	1.1	1.19722	1.3376	n.d.
Oxoglutarate C4	1.42958	4.00267	1.1	n.d.
Glutathione C4	1.42422	1.13949	1.19198	0.917526
Malate C2	1.1	2.76122	1.1	n.d.
Malate C3	1.1	2.56954	1.1	n.d.
Proline C4	1.74729	2.41235	1.56025	n.d.
Succinate C2/C3	3.08399	3.18677	3.68828	1.25624
