# Supplementary material for: Crosstalk between AML and stromal cells triggers acetate secretion through the metabolic rewiring of stromal cells
Source: eLife journal article supplement (doi:10.7554/elife.75908), 2022-09-02
Supplement: supp [file elife-75908-supp-v2.zip › elife_poa_e75908_Figure_2_figure_supplement_5_source_data_1.xlsx]

## Sheet: Fig 2 Supl 5
Acetate labelling in SKM-1 cells +/- ACSS2i
Source data
	Control	ACSS2i
Acetate C2	31.7314	12.1508
Aspartate C2	5.96172	2.09674
Aspartate C3	7.22081	2.21587
Acetylcarnitine C9	29.0561	10.8169
Glutamate C4	12.9709	9.98818
Glutamine C4	1.31074	1.17014
Oxoglutarate C4	6.37302	1.13614
Glutathione C4	13.2094	10.6703
Malate C2	3.67475	1.31149
Malate C3	4.96826	1.65614
Proline C4	11.5904	5.09381
