# Supplementary material for: Crosstalk between AML and stromal cells triggers acetate secretion through the metabolic rewiring of stromal cells
Source: eLife journal article supplement (doi:10.7554/elife.75908), 2022-09-02
Supplement: supp [file elife-75908-supp-v2.zip › elife_poa_e75908_Figure_2_source_data_1.xlsx]

## Sheet: Fig 2b
Acetate incorporation in SKM-1 and MS-5 cells cultured alone after 2h
	SKM-1			MS-5
Acetate C2	62.9173	50.7697	59.8186	32.5908	15.396	35.6493
Aspartate C2	13.1761	7.39993	10.5432	3.04542	1.65381	1.86794
Aspartate C3	17.5177	10.0922	12.8173	2.52913	1.49959	1.92325
Acetylcarnitine C9	37.8715	34.7855	39.2253	1.10016	1.10062	1.10059
Citrate C2	3.97508	7.31594	5.79322	1.10016	1.10062	1.10059
Fumarate C2	1.841	1.34065	1.1711	1.10016	1.10062	1.10059
Glutamate C4	36.3765	22.5977	21.9134	2.50934	1.72371	1.53339
Glutamine C4	1.45568	1.37102	1.27214	1.20749	1.10062	1.15465
Oxoglutarate C4	4.26095	4.74349	2.80967	1.10016	1.10062	1.10059
Glutathione C4	15.6985	15.6058	8.46159	2.02658	0.91261	1.15771
Malate C2	3.23107	2.91173	2.69112	1.10016	1.10062	1.10059
Malate C3	4.62509	3.10915	4.41255	1.10016	1.10062	1.10059
Proline C4	17.666	8.28778	7.7186	1.10016	1.10062	1.10059

## Sheet: 2c
Label incorporation from acetate in coculture 30min incubation SKM-1										Label incorporation from acetate in coculture 8h incubation SKM-1
	SKM1 30min acetate			MS5 (SKM1) 30min							SKM-1 co-culture			MS-5 co-culture
Acetate C2	10.6082	13.7997	10.2886	1.87787						Acetate C2	20.1288	30.6484	42.2953	1.02863	1.10821	1.33094
Aspartate C2	2.67912	2.74352	5.72689	0.985954						Aspartate C2	3.30586	1.10174	1.10881	1.88429	1.10116	1.10101
Aspartate C3	2.55838	3.67322	7.02293	1.13671						Aspartate C3	4.29955	1.10174	1.10881	1.29918	1.10116	1.10101
Acetylcarnitine C9	20.1487	10.475	19.2901	n.d.						Acetylcarnitine C9	10.6314	4.54214	10.1934	n.d.	n.d.	n.d.
Citrate C2	4.8806	13.199	7.95209	n.d.						Fumarate C2	1.71384	1.10174	1.10881	n.d.	n.d.	n.d.
Fumarate C2	1.17864	2.21184	1.87526	n.d.						Glutamate C4	5.23718	5.96356	6.53234	2.00465	1.35934	2.9857
Glutamate C2	2.89487	2.26083	2.32226	0.752804						Glutamine C4	1.50943	1.10174	1.10881	n.d.	n.d.	n.d.
Glutamate C3	2.70287	2.054	2.12562	0.915193						Oxoglutarate C4	3.61721	1.43916	1.78193	n.d.	n.d.	n.d.
Glutamate C4	13.9314	11.5059	11.745	1.02676						Glutathione C4	3.97502	2.50739	2.8442	1.7262	1.17383	2.27619
Glutamine C4	1.1	1.26493	1.15586	n.d.						Malate C2	3.34107	1.10174	1.75257	1.09673	1.10116	1.10101
Oxoglutarate C4	2.98958	7.4246	5.93434	0.771288						Malate C3	2.51244	1.10174	1.77601	n.d.	n.d.	n.d.
Glutathione C4	2.06279	1.48919	1.64939	1.10556						Proline C4	2.34095	1.18934	1.79942	n.d.	n.d.	n.d.
Malate C2	2.76375	7.75558	5.3018	n.d.
Malate C3	3.6561	5.55456	4.74943	1.25509
Proline C4	6.38541	4.59481	4.60708	n.d.
Succinate C2/C3	8.62881	6.1454	5.12784	1.3998

## Sheet: 2e
Cell viability in AML cell lines with AraC and ACSS2i 72h
Source data										Statistics
SKM-1	Medium control			Medium without glucose + acetate
DMSO	89.4	90.1	90.1	94.7	92.1	91.5				Compare cell means regardless of rows and columns
AraC	88.3	89.2	88.8	84.63	75.7	74.4
ACCS2i	14	8.9	6.3	84.4	77.2	62				Number of families	1
AraC+ACCS2i	3	1.75	1.8	61	38	47				Number of comparisons per family	28
										Alpha	0.05
Kasumi	Medium control			Medium without glucose + acetate						Tukey's multiple comparisons test	Mean Diff,	95,00% CI of diff,	Significant?	Summary	Adjusted P Value
DMSO	90.5	85.9	88.7	88.9	80.8	78.2
AraC	65.16	67.1	66.8	75.45	68.7	76.2				DMSO:Medium control vs. DMSO:Group B	-2.9	-20,64 to 14,84	No	ns	0.9989
ACCS2i	25.2	14.3	36	92	78	75.6				DMSO:Medium control vs. AraC:Medium control	1.1	-16,64 to 18,84	No	ns	>0,9999
AraC+ACCS2i	10.5	10.4	11.5	60.05	45.67	41				DMSO:Medium control vs. AraC:Group B	11.62	-6,121 to 29,37	No	ns	0.3658
										DMSO:Medium control vs. ACCS2i:Medium control	80.13	62,39 to 97,88	Yes	****	<0,0001
HL-60	Medium control			Medium without glucose + acetate						DMSO:Medium control vs. ACCS2i:Group B	15.33	-2,411 to 33,08	No	ns	0.1174
DMSO	90	85.9	85.1	94.1	95.4	95.4				DMSO:Medium control vs. AraC+ACCS2i:Medium control	87.68	69,94 to 105,4	Yes	****	<0,0001
AraC	12.7	14.8	12.5	34.5	48.6	54.1				DMSO:Medium control vs. AraC+ACCS2i:Group B	41.2	23,46 to 58,94	Yes	****	<0,0001
ACCS2i	9.1	14.1	12.9	68.54	76.9	78.2				DMSO:Group B vs. AraC:Medium control	4	-13,74 to 21,74	No	ns	0.9919
AraC+ACCS2i	9.9	12.1	12.2	19.34	35.2	28.8				DMSO:Group B vs. AraC:Group B	14.52	-3,221 to 32,27	No	ns	0.1539
										DMSO:Group B vs. ACCS2i:Medium control	83.03	65,29 to 100,8	Yes	****	<0,0001
										DMSO:Group B vs. ACCS2i:Group B	18.23	0,4887 to 35,98	Yes	*	0.0418
										DMSO:Group B vs. AraC+ACCS2i:Medium control	90.58	72,84 to 108,3	Yes	****	<0,0001
										DMSO:Group B vs. AraC+ACCS2i:Group B	44.1	26,36 to 61,84	Yes	****	<0,0001
										AraC:Medium control vs. AraC:Group B	10.52	-7,221 to 28,27	No	ns	0.4802
										AraC:Medium control vs. ACCS2i:Medium control	79.03	61,29 to 96,78	Yes	****	<0,0001
										AraC:Medium control vs. ACCS2i:Group B	14.23	-3,511 to 31,98	No	ns	0.1691
										AraC:Medium control vs. AraC+ACCS2i:Medium control	86.58	68,84 to 104,3	Yes	****	<0,0001
										AraC:Medium control vs. AraC+ACCS2i:Group B	40.1	22,36 to 57,84	Yes	****	<0,0001
										AraC:Group B vs. ACCS2i:Medium control	68.51	50,77 to 86,25	Yes	****	<0,0001
										AraC:Group B vs. ACCS2i:Group B	3.71	-14,03 to 21,45	No	ns	0.9948
										AraC:Group B vs. AraC+ACCS2i:Medium control	76.06	58,32 to 93,80	Yes	****	<0,0001
										AraC:Group B vs. AraC+ACCS2i:Group B	29.58	11,83 to 47,32	Yes	***	0.0006
										ACCS2i:Medium control vs. ACCS2i:Group B	-64.8	-82,54 to -47,06	Yes	****	<0,0001
										ACCS2i:Medium control vs. AraC+ACCS2i:Medium control	7.55	-10,19 to 25,29	No	ns	0.8104
										ACCS2i:Medium control vs. AraC+ACCS2i:Group B	-38.93	-56,68 to -21,19	Yes	****	<0,0001
										ACCS2i:Group B vs. AraC+ACCS2i:Medium control	72.35	54,61 to 90,09	Yes	****	<0,0001
										ACCS2i:Group B vs. AraC+ACCS2i:Group B	25.87	8,122 to 43,61	Yes	**	0.0023
										AraC+ACCS2i:Medium control vs. AraC+ACCS2i:Group B	-46.48	-64,23 to -28,74	Yes	****	<0,0001
										Test details	Mean 1	Mean 2	Mean Diff,	SE of diff,	N1	N2	q	DF
										DMSO:Medium control vs. DMSO:Group B	89.87	92.77	-2.9	5.125	3	3	0.8002	16
										DMSO:Medium control vs. AraC:Medium control	89.87	88.77	1.1	5.125	3	3	0.3035	16
										DMSO:Medium control vs. AraC:Group B	89.87	78.24	11.62	5.125	3	3	3.207	16
										DMSO:Medium control vs. ACCS2i:Medium control	89.87	9.733	80.13	5.125	3	3	22.11	16
										DMSO:Medium control vs. ACCS2i:Group B	89.87	74.53	15.33	5.125	3	3	4.231	16
										DMSO:Medium control vs. AraC+ACCS2i:Medium control	89.87	2.183	87.68	5.125	3	3	24.19	16
										DMSO:Medium control vs. AraC+ACCS2i:Group B	89.87	48.67	41.2	5.125	3	3	11.37	16
										DMSO:Group B vs. AraC:Medium control	92.77	88.77	4	5.125	3	3	1.104	16
										DMSO:Group B vs. AraC:Group B	92.77	78.24	14.52	5.125	3	3	4.007	16
										DMSO:Group B vs. ACCS2i:Medium control	92.77	9.733	83.03	5.125	3	3	22.91	16
										DMSO:Group B vs. ACCS2i:Group B	92.77	74.53	18.23	5.125	3	3	5.031	16
										DMSO:Group B vs. AraC+ACCS2i:Medium control	92.77	2.183	90.58	5.125	3	3	24.99	16
										DMSO:Group B vs. AraC+ACCS2i:Group B	92.77	48.67	44.1	5.125	3	3	12.17	16
										AraC:Medium control vs. AraC:Group B	88.77	78.24	10.52	5.125	3	3	2.904	16
										AraC:Medium control vs. ACCS2i:Medium control	88.77	9.733	79.03	5.125	3	3	21.81	16
										AraC:Medium control vs. ACCS2i:Group B	88.77	74.53	14.23	5.125	3	3	3.927	16
										AraC:Medium control vs. AraC+ACCS2i:Medium control	88.77	2.183	86.58	5.125	3	3	23.89	16
										AraC:Medium control vs. AraC+ACCS2i:Group B	88.77	48.67	40.1	5.125	3	3	11.06	16
										AraC:Group B vs. ACCS2i:Medium control	78.24	9.733	68.51	5.125	3	3	18.9	16
										AraC:Group B vs. ACCS2i:Group B	78.24	74.53	3.71	5.125	3	3	1.024	16
										AraC:Group B vs. AraC+ACCS2i:Medium control	78.24	2.183	76.06	5.125	3	3	20.99	16
										AraC:Group B vs. AraC+ACCS2i:Group B	78.24	48.67	29.58	5.125	3	3	8.161	16
										ACCS2i:Medium control vs. ACCS2i:Group B	9.733	74.53	-64.8	5.125	3	3	17.88	16
										ACCS2i:Medium control vs. AraC+ACCS2i:Medium control	9.733	2.183	7.55	5.125	3	3	2.083	16
										ACCS2i:Medium control vs. AraC+ACCS2i:Group B	9.733	48.67	-38.93	5.125	3	3	10.74	16
										ACCS2i:Group B vs. AraC+ACCS2i:Medium control	74.53	2.183	72.35	5.125	3	3	19.96	16
										ACCS2i:Group B vs. AraC+ACCS2i:Group B	74.53	48.67	25.87	5.125	3	3	7.137	16
										AraC+ACCS2i:Medium control vs. AraC+ACCS2i:Group B	2.183	48.67	-46.48	5.125	3	3	12.83	16
										Compare cell means regardless of rows and columns
										Number of families	1
										Number of comparisons per family	28
										Alpha	0.05
										Tukey's multiple comparisons test	Mean Diff,	95,00% CI of diff,	Significant?	Summary	Adjusted P Value
										DMSO:Medium control vs. DMSO:Group B	5.733	-12,96 to 24,43	No	ns	0.9561
										DMSO:Medium control vs. AraC:Medium control	22.01	3,321 to 40,71	Yes	*	0.0154
										DMSO:Medium control vs. AraC:Group B	14.92	-3,776 to 33,61	No	ns	0.1731
										DMSO:Medium control vs. ACCS2i:Medium control	63.2	44,51 to 81,89	Yes	****	<0,0001
										DMSO:Medium control vs. ACCS2i:Group B	6.5	-12,19 to 25,19	No	ns	0.9193
										DMSO:Medium control vs. AraC+ACCS2i:Medium control	77.57	58,87 to 96,26	Yes	****	<0,0001
										DMSO:Medium control vs. AraC+ACCS2i:Group B	39.46	20,77 to 58,15	Yes	****	<0,0001
										DMSO:Group B vs. AraC:Medium control	16.28	-2,412 to 34,97	No	ns	0.1126
										DMSO:Group B vs. AraC:Group B	9.183	-9,509 to 27,88	No	ns	0.687
										DMSO:Group B vs. ACCS2i:Medium control	57.47	38,77 to 76,16	Yes	****	<0,0001
										DMSO:Group B vs. ACCS2i:Group B	0.7667	-17,93 to 19,46	No	ns	>0,9999
										DMSO:Group B vs. AraC+ACCS2i:Medium control	71.83	53,14 to 90,53	Yes	****	<0,0001
										DMSO:Group B vs. AraC+ACCS2i:Group B	33.73	15,03 to 52,42	Yes	***	0.0002
										AraC:Medium control vs. AraC:Group B	-7.097	-25,79 to 11,60	No	ns	0.8806
										AraC:Medium control vs. ACCS2i:Medium control	41.19	22,49 to 59,88	Yes	****	<0,0001
										AraC:Medium control vs. ACCS2i:Group B	-15.51	-34,21 to 3,179	No	ns	0.1439
										AraC:Medium control vs. AraC+ACCS2i:Medium control	55.55	36,86 to 74,25	Yes	****	<0,0001
										AraC:Medium control vs. AraC+ACCS2i:Group B	17.45	-1,246 to 36,14	No	ns	0.0766
										AraC:Group B vs. ACCS2i:Medium control	48.28	29,59 to 66,98	Yes	****	<0,0001
										AraC:Group B vs. ACCS2i:Group B	-8.417	-27,11 to 10,28	No	ns	0.7664
										AraC:Group B vs. AraC+ACCS2i:Medium control	62.65	43,96 to 81,34	Yes	****	<0,0001
										AraC:Group B vs. AraC+ACCS2i:Group B	24.54	5,851 to 43,24	Yes	**	0.0062
										ACCS2i:Medium control vs. ACCS2i:Group B	-56.7	-75,39 to -38,01	Yes	****	<0,0001
										ACCS2i:Medium control vs. AraC+ACCS2i:Medium control	14.37	-4,326 to 33,06	No	ns	0.2043
										ACCS2i:Medium control vs. AraC+ACCS2i:Group B	-23.74	-42,43 to -5,048	Yes	**	0.0083
										ACCS2i:Group B vs. AraC+ACCS2i:Medium control	71.07	52,37 to 89,76	Yes	****	<0,0001
										ACCS2i:Group B vs. AraC+ACCS2i:Group B	32.96	14,27 to 51,65	Yes	***	0.0003
										AraC+ACCS2i:Medium control vs. AraC+ACCS2i:Group B	-38.11	-56,80 to -19,41	Yes	****	<0,0001
										Test details	Mean 1	Mean 2	Mean Diff,	SE of diff,	N1	N2	q	DF
										DMSO:Medium control vs. DMSO:Group B	88.37	82.63	5.733	5.399	3	3	1.502	16
										DMSO:Medium control vs. AraC:Medium control	88.37	66.35	22.01	5.399	3	3	5.766	16
										DMSO:Medium control vs. AraC:Group B	88.37	73.45	14.92	5.399	3	3	3.907	16
										DMSO:Medium control vs. ACCS2i:Medium control	88.37	25.17	63.2	5.399	3	3	16.55	16
										DMSO:Medium control vs. ACCS2i:Group B	88.37	81.87	6.5	5.399	3	3	1.703	16
										DMSO:Medium control vs. AraC+ACCS2i:Medium control	88.37	10.8	77.57	5.399	3	3	20.32	16
										DMSO:Medium control vs. AraC+ACCS2i:Group B	88.37	48.91	39.46	5.399	3	3	10.34	16
										DMSO:Group B vs. AraC:Medium control	82.63	66.35	16.28	5.399	3	3	4.264	16
										DMSO:Group B vs. AraC:Group B	82.63	73.45	9.183	5.399	3	3	2.405	16
										DMSO:Group B vs. ACCS2i:Medium control	82.63	25.17	57.47	5.399	3	3	15.05	16
										DMSO:Group B vs. ACCS2i:Group B	82.63	81.87	0.7667	5.399	3	3	0.2008	16
										DMSO:Group B vs. AraC+ACCS2i:Medium control	82.63	10.8	71.83	5.399	3	3	18.82	16
										DMSO:Group B vs. AraC+ACCS2i:Group B	82.63	48.91	33.73	5.399	3	3	8.834	16
										AraC:Medium control vs. AraC:Group B	66.35	73.45	-7.097	5.399	3	3	1.859	16
										AraC:Medium control vs. ACCS2i:Medium control	66.35	25.17	41.19	5.399	3	3	10.79	16
										AraC:Medium control vs. ACCS2i:Group B	66.35	81.87	-15.51	5.399	3	3	4.064	16
										AraC:Medium control vs. AraC+ACCS2i:Medium control	66.35	10.8	55.55	5.399	3	3	14.55	16
										AraC:Medium control vs. AraC+ACCS2i:Group B	66.35	48.91	17.45	5.399	3	3	4.57	16
										AraC:Group B vs. ACCS2i:Medium control	73.45	25.17	48.28	5.399	3	3	12.65	16
										AraC:Group B vs. ACCS2i:Group B	73.45	81.87	-8.417	5.399	3	3	2.205	16
										AraC:Group B vs. AraC+ACCS2i:Medium control	73.45	10.8	62.65	5.399	3	3	16.41	16
										AraC:Group B vs. AraC+ACCS2i:Group B	73.45	48.91	24.54	5.399	3	3	6.429	16
										ACCS2i:Medium control vs. ACCS2i:Group B	25.17	81.87	-56.7	5.399	3	3	14.85	16
										ACCS2i:Medium control vs. AraC+ACCS2i:Medium control	25.17	10.8	14.37	5.399	3	3	3.763	16
										ACCS2i:Medium control vs. AraC+ACCS2i:Group B	25.17	48.91	-23.74	5.399	3	3	6.218	16
										ACCS2i:Group B vs. AraC+ACCS2i:Medium control	81.87	10.8	71.07	5.399	3	3	18.61	16
										ACCS2i:Group B vs. AraC+ACCS2i:Group B	81.87	48.91	32.96	5.399	3	3	8.633	16
										AraC+ACCS2i:Medium control vs. AraC+ACCS2i:Group B	10.8	48.91	-38.11	5.399	3	3	9.982	16
										Compare cell means regardless of rows and columns
										Number of families	1
										Number of comparisons per family	28
										Alpha	0.05
										Tukey's multiple comparisons test	Mean Diff,	95,00% CI of diff,	Significant?	Summary	Adjusted P Value
										DMSO:Medium control vs. DMSO:Group B	-7.967	-22,48 to 6,549	No	ns	0.5693
										DMSO:Medium control vs. AraC:Medium control	73.67	59,15 to 88,18	Yes	****	<0,0001
										DMSO:Medium control vs. AraC:Group B	41.27	26,75 to 55,78	Yes	****	<0,0001
										DMSO:Medium control vs. ACCS2i:Medium control	74.97	60,45 to 89,48	Yes	****	<0,0001
										DMSO:Medium control vs. ACCS2i:Group B	12.45	-2,063 to 26,97	No	ns	0.1219
										DMSO:Medium control vs. AraC+ACCS2i:Medium control	75.6	61,08 to 90,12	Yes	****	<0,0001
										DMSO:Medium control vs. AraC+ACCS2i:Group B	59.22	44,70 to 73,74	Yes	****	<0,0001
										DMSO:Group B vs. AraC:Medium control	81.63	67,12 to 96,15	Yes	****	<0,0001
										DMSO:Group B vs. AraC:Group B	49.23	34,72 to 63,75	Yes	****	<0,0001
										DMSO:Group B vs. ACCS2i:Medium control	82.93	68,42 to 97,45	Yes	****	<0,0001
										DMSO:Group B vs. ACCS2i:Group B	20.42	5,904 to 34,94	Yes	**	0.0033
										DMSO:Group B vs. AraC+ACCS2i:Medium control	83.57	69,05 to 98,08	Yes	****	<0,0001
										DMSO:Group B vs. AraC+ACCS2i:Group B	67.19	52,67 to 81,70	Yes	****	<0,0001
										AraC:Medium control vs. AraC:Group B	-32.4	-46,92 to -17,88	Yes	****	<0,0001
										AraC:Medium control vs. ACCS2i:Medium control	1.3	-13,22 to 15,82	No	ns	>0,9999
										AraC:Medium control vs. ACCS2i:Group B	-61.21	-75,73 to -46,70	Yes	****	<0,0001
										AraC:Medium control vs. AraC+ACCS2i:Medium control	1.933	-12,58 to 16,45	No	ns	0.9997
										AraC:Medium control vs. AraC+ACCS2i:Group B	-14.45	-28,96 to 0,06931	No	ns	0.0516
										AraC:Group B vs. ACCS2i:Medium control	33.7	19,18 to 48,22	Yes	****	<0,0001
										AraC:Group B vs. ACCS2i:Group B	-28.81	-43,33 to -14,30	Yes	****	<0,0001
										AraC:Group B vs. AraC+ACCS2i:Medium control	34.33	19,82 to 48,85	Yes	****	<0,0001
										AraC:Group B vs. AraC+ACCS2i:Group B	17.95	3,437 to 32,47	Yes	*	0.0103
										ACCS2i:Medium control vs. ACCS2i:Group B	-62.51	-77,03 to -48,00	Yes	****	<0,0001
										ACCS2i:Medium control vs. AraC+ACCS2i:Medium control	0.6333	-13,88 to 15,15	No	ns	>0,9999
										ACCS2i:Medium control vs. AraC+ACCS2i:Group B	-15.75	-30,26 to -1,231	Yes	*	0.0287
										ACCS2i:Group B vs. AraC+ACCS2i:Medium control	63.15	48,63 to 77,66	Yes	****	<0,0001
										ACCS2i:Group B vs. AraC+ACCS2i:Group B	46.77	32,25 to 61,28	Yes	****	<0,0001
										AraC+ACCS2i:Medium control vs. AraC+ACCS2i:Group B	-16.38	-30,90 to -1,864	Yes	*	0.0214
										Test details	Mean 1	Mean 2	Mean Diff,	SE of diff,	N1	N2	q	DF
										DMSO:Medium control vs. DMSO:Group B	87	94.97	-7.967	4.193	3	3	2.687	16
										DMSO:Medium control vs. AraC:Medium control	87	13.33	73.67	4.193	3	3	24.85	16
										DMSO:Medium control vs. AraC:Group B	87	45.73	41.27	4.193	3	3	13.92	16
										DMSO:Medium control vs. ACCS2i:Medium control	87	12.03	74.97	4.193	3	3	25.29	16
										DMSO:Medium control vs. ACCS2i:Group B	87	74.55	12.45	4.193	3	3	4.2	16
										DMSO:Medium control vs. AraC+ACCS2i:Medium control	87	11.4	75.6	4.193	3	3	25.5	16
										DMSO:Medium control vs. AraC+ACCS2i:Group B	87	27.78	59.22	4.193	3	3	19.97	16
										DMSO:Group B vs. AraC:Medium control	94.97	13.33	81.63	4.193	3	3	27.53	16
										DMSO:Group B vs. AraC:Group B	94.97	45.73	49.23	4.193	3	3	16.61	16
										DMSO:Group B vs. ACCS2i:Medium control	94.97	12.03	82.93	4.193	3	3	27.97	16
										DMSO:Group B vs. ACCS2i:Group B	94.97	74.55	20.42	4.193	3	3	6.888	16
										DMSO:Group B vs. AraC+ACCS2i:Medium control	94.97	11.4	83.57	4.193	3	3	28.19	16
										DMSO:Group B vs. AraC+ACCS2i:Group B	94.97	27.78	67.19	4.193	3	3	22.66	16
										AraC:Medium control vs. AraC:Group B	13.33	45.73	-32.4	4.193	3	3	10.93	16
										AraC:Medium control vs. ACCS2i:Medium control	13.33	12.03	1.3	4.193	3	3	0.4385	16
										AraC:Medium control vs. ACCS2i:Group B	13.33	74.55	-61.21	4.193	3	3	20.65	16
										AraC:Medium control vs. AraC+ACCS2i:Medium control	13.33	11.4	1.933	4.193	3	3	0.6521	16
										AraC:Medium control vs. AraC+ACCS2i:Group B	13.33	27.78	-14.45	4.193	3	3	4.873	16
										AraC:Group B vs. ACCS2i:Medium control	45.73	12.03	33.7	4.193	3	3	11.37	16
										AraC:Group B vs. ACCS2i:Group B	45.73	74.55	-28.81	4.193	3	3	9.719	16
										AraC:Group B vs. AraC+ACCS2i:Medium control	45.73	11.4	34.33	4.193	3	3	11.58	16
										AraC:Group B vs. AraC+ACCS2i:Group B	45.73	27.78	17.95	4.193	3	3	6.056	16
										ACCS2i:Medium control vs. ACCS2i:Group B	12.03	74.55	-62.51	4.193	3	3	21.09	16
										ACCS2i:Medium control vs. AraC+ACCS2i:Medium control	12.03	11.4	0.6333	4.193	3	3	0.2136	16
										ACCS2i:Medium control vs. AraC+ACCS2i:Group B	12.03	27.78	-15.75	4.193	3	3	5.311	16
										ACCS2i:Group B vs. AraC+ACCS2i:Medium control	74.55	11.4	63.15	4.193	3	3	21.3	16
										ACCS2i:Group B vs. AraC+ACCS2i:Group B	74.55	27.78	46.77	4.193	3	3	15.77	16
										AraC+ACCS2i:Medium control vs. AraC+ACCS2i:Group B	11.4	27.78	-16.38	4.193	3	3	5.525	16
