# Supplementary material for: Crosstalk between AML and stromal cells triggers acetate secretion through the metabolic rewiring of stromal cells
Source: eLife journal article supplement (doi:10.7554/elife.75908), 2022-09-02
Supplement: supp [file elife-75908-supp-v2.zip › elife_poa_e75908_Figure_3_figure_supplement_1_source_data_1.xlsx]

## Sheet: Fig 3 Supl 1c
mRNA expression in MS-5 cells cocultured with SKM-1 cells relative to MS-5 alone
Source data
	MS-5 only			MS-5 co-culture
	Mean	SD	n	Mean	SD	n
HK2	1	0.0934728	3	1.54756	0.177343	3
PDHX	1	0.0846409	3	0.63728	0.110432	3
PDK1	1	0.0768199	3	3.41054	0.285361	3
PDK2	1	0.0838334	3	1.18921	0.0583739	3
Statistics
Table Analyzed	qPCR (MS-5) HK2		Table Analyzed	qPCR (MS-5) pdhx		Table Analyzed	qPCR (MS-5) pdk1		Table Analyzed	qPCR (MS-5) pdk2
Column B	MS-5 co-culture		Column B	MS-5 co-culture		Column B	MS-5 co-culture		Column B	MS-5 co-culture
vs.	vs,		vs.	vs,		vs.	vs,		vs.	vs,
Column A	MS-5 only		Column A	MS-5 only		Column A	MS-5 only		Column A	MS-5 only
Unpaired t test with Welch's correction			Unpaired t test with Welch's correction			Unpaired t test with Welch's correction			Unpaired t test with Welch's correction
P value	0.0175		P value	0.0124		P value	0.0028		P value	0.0384
P value summary	*		P value summary	*		P value summary	**		P value summary	*
Significantly different (P < 0.05)?	Yes		Significantly different (P < 0.05)?	Yes		Significantly different (P < 0.05)?	Yes		Significantly different (P < 0.05)?	Yes
One- or two-tailed P value?	Two-tailed		One- or two-tailed P value?	Two-tailed		One- or two-tailed P value?	Two-tailed		One- or two-tailed P value?	Two-tailed
Welch-corrected t, df	t=4,731, df=3,032		Welch-corrected t, df	t=4,515, df=3,747		Welch-corrected t, df	t=14,13, df=2,288		Welch-corrected t, df	t=3,208, df=3,570
How big is the difference?			How big is the difference?			How big is the difference?			How big is the difference?
Mean of column A	1		Mean of column A	1		Mean of column A	1		Mean of column A	1
Mean of column B	1.548		Mean of column B	0.6373		Mean of column B	3.411		Mean of column B	1.189
Difference between means (B - A) ± SEM	0,5476 ± 0,1157		Difference between means (B - A) ± SEM	-0,3627 ± 0,08033		Difference between means (B - A) ± SEM	2,411 ± 0,1706		Difference between means (B - A) ± SEM	0,1892 ± 0,05898
95% confidence interval	0,1814 to 0,9137		95% confidence interval	-0,5918 to -0,1336		95% confidence interval	1,758 to 3,063		95% confidence interval	0,01738 to 0,3610
R squared (eta squared)	0.8807		R squared (eta squared)	0.8447		R squared (eta squared)	0.9887		R squared (eta squared)	0.7424
F test to compare variances			F test to compare variances			F test to compare variances			F test to compare variances
F, DFn, Dfd	3,600, 2, 2		F, DFn, Dfd	1,702, 2, 2		F, DFn, Dfd	13,80, 2, 2		F, DFn, Dfd	2,063, 2, 2
P value	0.4348		P value	0.7401		P value	0.1351		P value	0.6531
P value summary	ns		P value summary	ns		P value summary	ns		P value summary	ns
Significantly different (P < 0.05)?	No		Significantly different (P < 0.05)?	No		Significantly different (P < 0.05)?	No		Significantly different (P < 0.05)?	No
Data analyzed			Data analyzed			Data analyzed			Data analyzed
Sample size, column A	3		Sample size, column A	3		Sample size, column A	3		Sample size, column A	3
Sample size, column B	3		Sample size, column B	3		Sample size, column B	3		Sample size, column B	3
