# Supplementary material for: Crosstalk between AML and stromal cells triggers acetate secretion through the metabolic rewiring of stromal cells
Source: eLife journal article supplement (doi:10.7554/elife.75908), 2022-09-02
Supplement: supp [file elife-75908-supp-v2.zip › elife_poa_e75908_Figure_3_source_data_1.xlsx]

## Sheet: Fig 3a
MS-5 only vs co-culture Top 25 Hallmark gene sets ranked by expression
	-log10pvalue
G2M CHECKPOINT	0.90309
E2F TARGETS	1
MYC TARGETS V1	1.07918
DNA REPAIR	1.63347
MYC TARGETS V2	2.47202
REACTIVE OXIGEN SPECIES PATHWAY	1.19237
IL6 JAK STAT3 SIGNALING	1.4441
COAGULATION	1.6846
NOTCH SIGNALING	1.9989
INFLAMMATORY RESPONSE	2.10616
APOPTOSIS	2.71955
INTERFERON ALPHA RESPONSE	2.88095
IL2 STAT5 SIGNALING	2.92043
EPITHELIAL MESENCHYMAL TRANSITION	3.30007
APICAL JUNCTION	3.3006
COMPLEMENT	3.5224
GLYCOLYSIS	3.52249
KRAS SIGNALING UP	3.69814
INTERFERON GAMMA RESPONSE	3.69849
PANCREAS BETA CELLS	3.91519
PI3K AKT MTOR SIGNALING	3.99712
ALLOGRAFT REJECTION	3.9987
UV RESPONSE UP	3.99952
HYPOXIA	3.99961
TNFA SIGNALING VIA NFKB	3.99961

## Sheet: Fig 3c
Log2FC values for genes involved in glycolysis and other pyruvate metabolism related genes
Log2FC	Glycolysis			Pyruvate metabolism
	MS-5 only vs. co-culture				MS-5 only vs. co-culture
Slc2a1	1.49413			Mpc1	-0.285846
Slc2a4	1.23082			Mpc2	-0.219799
Pgm1	1.08178			Pdha1	-0.129107
Hk2	1.26927			Pdhb	-0.249451
Gpi1	1.14295			Pdhx	-0.545286
Pfkl	1.59677			Dlat	-0.07271
Aldoa	-0.00224909			Dld	-0.119121
Gapdh	0.712131			Pdp1	0.122596
Pgk1	0.959785			Pdp2	0.0638851
Pgam1	1.0423			Pdk1	2.22233
Pgam2	1.30112			Pdk2	0.724424
Eno1	0.90068			Pdk4	0.412957
Eno1b	0.926068			Pcx	-0.0753467
Eno2	2.1584			Ldha	1.14902
Eno3	-0.0436512			Gpt	-0.209012
Pkm	0.651067			Acss2	0.930942
Pfkfb3	1.6848			Acss3	0.54594

## Sheet: Fig 3d
Label incorporation from U-glucose into extracellular metabolites in AML cell lines in co-culture
Source data												Statistics
SKM-1	SKM-1 only			MS-5 only			Co-culture
Acetate	2.58888	2.50546	2.63779	16.753	10.8152	20.31	39.507	44.3742	44.064			Table Analyzed	Acetate (SKM-1)		Table Analyzed	Acetate (Kasumi)		Table Analyzed	Acetate (HL-60)
Alanine	28.6929	32.7643	43.7825	18.4602	9.47114	25.232	43.3379	45.029	49.7723
Lactate	50.7819	55.3908	66.3146	47.9645	22.6603	56.3582	67.5605	69.2405	71.2271			Column C	Co-culture		Column C	Co-culture		Column C	Co-culture
												vs.	vs,		vs.	vs,		vs.	vs,
												Column A	SKM-1 only		Column A	Kasumi only		Column A	HL-60 only
Kasumi	Kasumi only			MS-5 only			Co-culture
Acetate	2.19683	2.18716	2.53016	16.753	10.8152	20.31	38.6237	45.6178	40.2273			Unpaired t test			Unpaired t test			Unpaired t test
Alanine	21.8341	35.0799	34.7768	18.4602	9.47114	25.232	38.4985	47.9978	45.5046			P value	<0,0001		P value	0.0047		P value	0.001
Lactate	49.1454	57.4818	63.6425	47.9645	22.6603	56.3582	64.3259	68.4202	70.611			P value summary	****		P value summary	**		P value summary	***
												Significantly different (P < 0.05)?	Yes		Significantly different (P < 0.05)?	Yes		Significantly different (P < 0.05)?	Yes
												One- or two-tailed P value?	Two-tailed		One- or two-tailed P value?	Two-tailed		One- or two-tailed P value?	Two-tailed
HL-60	HL-60 only			MS-5 only			Co-culture					t, df	t=25,46, df=4		t, df	t=5,687, df=4		t, df	t=8,669, df=4
Acetate	11.1192	18.9031	12.6493	16.753	10.8152	20.31	40.682	45.3205	38.3504
Alanine	18.8638	17.3273	21.5629	18.4602	9.47114	25.232	43.3837	46.5567	40.089			How big is the difference?			How big is the difference?			How big is the difference?
Lactate	53.9971	54.9251	59.4258	47.9645	22.6603	56.3582	71.5572	72.8015	69.1962			Mean of column A	2.577		Mean of column A	15.75		Mean of column A	14.22
												Mean of column C	42.65		Mean of column C	28.88		Mean of column C	41.45
												Difference between means (C - A) ± SEM	40,07 ± 1,574		Difference between means (C - A) ± SEM	13,13 ± 2,309		Difference between means (C - A) ± SEM	27,23 ± 3,141
												95% confidence interval	35,70 to 44,44		95% confidence interval	6,720 to 19,54		95% confidence interval	18,51 to 35,95
												R squared (eta squared)	0.9939		R squared (eta squared)	0.8899		R squared (eta squared)	0.9495
												F test to compare variances			F test to compare variances			F test to compare variances
												F, DFn, Dfd	1659, 2, 2		F, DFn, Dfd	1,248, 2, 2		F, DFn, Dfd	1,351, 2, 2
												P value	0.0012		P value	0.8899		P value	0.8507
												P value summary	**		P value summary	ns		P value summary	ns
												Significantly different (P < 0.05)?	Yes		Significantly different (P < 0.05)?	No		Significantly different (P < 0.05)?	No
												Data analyzed			Data analyzed			Data analyzed
												Sample size, column A	3		Sample size, column A	3		Sample size, column A	3
												Sample size, column C	3		Sample size, column C	3		Sample size, column C	3
												Table Analyzed	Acetate (SKM-1)		Table Analyzed	Acetate (Kasumi)		Table Analyzed	Acetate (HL-60)
												Column C	Co-culture		Column C	Co-culture		Column C	Co-culture
												vs.	vs,		vs.	vs,		vs.	vs,
												Column B	MS-5 only		Column B	MS-5 only		Column B	MS-5 only
												Unpaired t test			Unpaired t test			Unpaired t test
												P value	0.0011		P value	0.0002		P value	0.0018
												P value summary	**		P value summary	***		P value summary	**
												Significantly different (P < 0.05)?	Yes		Significantly different (P < 0.05)?	Yes		Significantly different (P < 0.05)?	Yes
												One- or two-tailed P value?	Two-tailed		One- or two-tailed P value?	Two-tailed		One- or two-tailed P value?	Two-tailed
												t, df	t=8,379, df=4		t, df	t=12,42, df=4		t, df	t=7,400, df=4
												How big is the difference?			How big is the difference?			How big is the difference?
												Mean of column B	15.96		Mean of column B	5.271		Mean of column B	15.96
												Mean of column C	42.65		Mean of column C	28.88		Mean of column C	41.45
												Difference between means (C - B) ± SEM	26,69 ± 3,185		Difference between means (C - B) ± SEM	23,61 ± 1,901		Difference between means (C - B) ± SEM	25,49 ± 3,445
												95% confidence interval	17,85 to 35,53		95% confidence interval	18,33 to 28,88		95% confidence interval	15,93 to 35,06
												R squared (eta squared)	0.9461		R squared (eta squared)	0.9747		R squared (eta squared)	0.9319
												F test to compare variances			F test to compare variances			F test to compare variances
												F, DFn, Dfd	3,099, 2, 2		F, DFn, Dfd	1,910, 2, 2		F, DFn, Dfd	1,828, 2, 2
												P value	0.4879		P value	0.6872		P value	0.7073
												P value summary	ns		P value summary	ns		P value summary	ns
												Significantly different (P < 0.05)?	No		Significantly different (P < 0.05)?	No		Significantly different (P < 0.05)?	No
												Data analyzed			Data analyzed			Data analyzed
												Sample size, column B	3		Sample size, column B	3		Sample size, column B	3
												Sample size, column C	3		Sample size, column C	3		Sample size, column C	3
												Table Analyzed	Alanine (SKM-1)		Table Analyzed	Alanine (Kasumi)		Table Analyzed	Alanine (HL-60)
												Column C	Co-culture		Column C	Co-culture		Column C	Co-culture
												vs.	vs,		vs.	vs,		vs.	vs,
												Column A	SKM-1 only		Column A	Kasumi only		Column A	HL-60 only
												Unpaired t test			Unpaired t test			Unpaired t test
												P value	0.0889		P value	0.0614		P value	0.0004
												P value summary	ns		P value summary	ns		P value summary	***
												Significantly different (P < 0.05)?	No		Significantly different (P < 0.05)?	No		Significantly different (P < 0.05)?	Yes
												One- or two-tailed P value?	Two-tailed		One- or two-tailed P value?	Two-tailed		One- or two-tailed P value?	Two-tailed
												t, df	t=2,237, df=4		t, df	t=2,579, df=4		t, df	t=10,75, df=4
												How big is the difference?			How big is the difference?			How big is the difference?
												Mean of column A	35.08		Mean of column A	30.56		Mean of column A	19.25
												Mean of column C	46.05		Mean of column C	44		Mean of column C	43.34
												Difference between means (C - A) ± SEM	10,97 ± 4,901		Difference between means (C - A) ± SEM	13,44 ± 5,210		Difference between means (C - A) ± SEM	24,09 ± 2,240
												95% confidence interval	-2,642 to 24,58		95% confidence interval	-1,029 to 27,90		95% confidence interval	17,87 to 30,31
												R squared (eta squared)	0.5559		R squared (eta squared)	0.6245		R squared (eta squared)	0.9666
												F test to compare variances			F test to compare variances			F test to compare variances
												F, DFn, Dfd	5,478, 2, 2		F, DFn, Dfd	2,357, 2, 2		F, DFn, Dfd	2,275, 2, 2
												P value	0.3088		P value	0.5957		P value	0.6107
												P value summary	ns		P value summary	ns		P value summary	ns
												Significantly different (P < 0.05)?	No		Significantly different (P < 0.05)?	No		Significantly different (P < 0.05)?	No
												Data analyzed			Data analyzed			Data analyzed
												Sample size, column A	3		Sample size, column A	3		Sample size, column A	3
												Sample size, column C	3		Sample size, column C	3		Sample size, column C	3
												Table Analyzed	Alanine (SKM-1)		Table Analyzed	Alanine (Kasumi)		Table Analyzed	Alanine (HL-60)
												Column C	Co-culture		Column C	Co-culture		Column C	Co-culture
												vs.	vs,		vs.	vs,		vs.	vs,
												Column B	MS-5 only		Column B	MS-5 only		Column B	MS-5 only
												Unpaired t test			Unpaired t test			Unpaired t test
												P value	0.0046		P value	0.0081		P value	0.0065
												P value summary	**		P value summary	**		P value summary	**
												Significantly different (P < 0.05)?	Yes		Significantly different (P < 0.05)?	Yes		Significantly different (P < 0.05)?	Yes
												One- or two-tailed P value?	Two-tailed		One- or two-tailed P value?	Two-tailed		One- or two-tailed P value?	Two-tailed
												t, df	t=5,717, df=4		t, df	t=4,886, df=4		t, df	t=5,195, df=4
												How big is the difference?			How big is the difference?			How big is the difference?
												Mean of column B	17.72		Mean of column B	17.72		Mean of column B	17.72
												Mean of column C	46.05		Mean of column C	44		Mean of column C	43.34
												Difference between means (C - B) ± SEM	28,33 ± 4,954		Difference between means (C - B) ± SEM	26,28 ± 5,378		Difference between means (C - B) ± SEM	25,62 ± 4,932
												95% confidence interval	14,57 to 42,08		95% confidence interval	11,35 to 41,21		95% confidence interval	11,93 to 39,32
												R squared (eta squared)	0.891		R squared (eta squared)	0.8565		R squared (eta squared)	0.8709
												F test to compare variances			F test to compare variances			F test to compare variances
												F, DFn, Dfd	5,618, 2, 2		F, DFn, Dfd	2,577, 2, 2		F, DFn, Dfd	5,977, 2, 2
												P value	0.3022		P value	0.5591		P value	0.2867
												P value summary	ns		P value summary	ns		P value summary	ns
												Significantly different (P < 0.05)?	No		Significantly different (P < 0.05)?	No		Significantly different (P < 0.05)?	No
												Data analyzed			Data analyzed			Data analyzed
												Sample size, column B	3		Sample size, column B	3		Sample size, column B	3
												Sample size, column C	3		Sample size, column C	3		Sample size, column C	3
												Table Analyzed	Lactate (SKM-1)		Table Analyzed	Lactate (Kasumi)		Table Analyzed	Lactate (HL-60)
												Column C	Co-culture		Column C	Co-culture		Column C	Co-culture
												vs.	vs,		vs.	vs,		vs.	vs,
												Column A	SKM-1 only		Column A	Kasumi only		Column A	HL-60 only
												Unpaired t test			Unpaired t test			Unpaired t test
												P value	0.0663		P value	0.074		P value	0.0016
												P value summary	ns		P value summary	ns		P value summary	**
												Significantly different (P < 0.05)?	No		Significantly different (P < 0.05)?	No		Significantly different (P < 0.05)?	Yes
												One- or two-tailed P value?	Two-tailed		One- or two-tailed P value?	Two-tailed		One- or two-tailed P value?	Two-tailed
												t, df	t=2,507, df=4		t, df	t=2,405, df=4		t, df	t=7,603, df=4
												How big is the difference?			How big is the difference?			How big is the difference?
												Mean of column A	57.5		Mean of column A	56.76		Mean of column A	56.12
												Mean of column C	69.34		Mean of column C	67.79		Mean of column C	71.18
												Difference between means (C - A) ± SEM	11,85 ± 4,726		Difference between means (C - A) ± SEM	11,03 ± 4,587		Difference between means (C - A) ± SEM	15,07 ± 1,982
												95% confidence interval	-1,275 to 24,97		95% confidence interval	-1,706 to 23,76		95% confidence interval	9,566 to 20,57
												R squared (eta squared)	0.611		R squared (eta squared)	0.5911		R squared (eta squared)	0.9353
												F test to compare variances			F test to compare variances			F test to compare variances
												F, DFn, Dfd	18,89, 2, 2		F, DFn, Dfd	5,201, 2, 2		F, DFn, Dfd	2,514, 2, 2
												P value	0.1005		P value	0.3225		P value	0.5691
												P value summary	ns		P value summary	ns		P value summary	ns
												Significantly different (P < 0.05)?	No		Significantly different (P < 0.05)?	No		Significantly different (P < 0.05)?	No
												Data analyzed			Data analyzed			Data analyzed
												Sample size, column A	3		Sample size, column A	3		Sample size, column A	3
												Sample size, column C	3		Sample size, column C	3		Sample size, column C	3
												Table Analyzed	Lactate (SKM-1)		Table Analyzed	Lactate (Kasumi)		Table Analyzed	Lactate (HL-60)
												Column C	Co-culture		Column C	Co-culture		Column C	Co-culture
												vs.	vs,		vs.	vs,		vs.	vs,
												Column B	MS-5 only		Column B	MS-5 only		Column B	MS-5 only
												Unpaired t test			Unpaired t test			Unpaired t test
												P value	0.0568		P value	0.0687		P value	0.0472
												P value summary	ns		P value summary	ns		P value summary	*
												Significantly different (P < 0.05)?	No		Significantly different (P < 0.05)?	No		Significantly different (P < 0.05)?	Yes
												One- or two-tailed P value?	Two-tailed		One- or two-tailed P value?	Two-tailed		One- or two-tailed P value?	Two-tailed
												t, df	t=2,653, df=4		t, df	t=2,473, df=4		t, df	t=2,834, df=4
												How big is the difference?			How big is the difference?			How big is the difference?
												Mean of column B	42.33		Mean of column B	42.33		Mean of column B	42.33
												Mean of column C	69.34		Mean of column C	67.79		Mean of column C	71.18
												Difference between means (C - B) ± SEM	27,02 ± 10,18		Difference between means (C - B) ± SEM	25,46 ± 10,29		Difference between means (C - B) ± SEM	28,86 ± 10,18
												95% confidence interval	-1,258 to 55,29		95% confidence interval	-3,122 to 54,04		95% confidence interval	0,5852 to 57,13
												R squared (eta squared)	0.6376		R squared (eta squared)	0.6046		R squared (eta squared)	0.6675
												F test to compare variances			F test to compare variances			F test to compare variances
												F, DFn, Dfd	91,35, 2, 2		F, DFn, Dfd	30,24, 2, 2		F, DFn, Dfd	91,76, 2, 2
												P value	0.0217		P value	0.064		P value	0.0216
												P value summary	*		P value summary	ns		P value summary	*
												Significantly different (P < 0.05)?	Yes		Significantly different (P < 0.05)?	No		Significantly different (P < 0.05)?	Yes
												Data analyzed			Data analyzed			Data analyzed
												Sample size, column B	3		Sample size, column B	3		Sample size, column B	3
												Sample size, column C	3		Sample size, column C	3		Sample size, column C	3

## Sheet: Fig 3e
Label incorporation from U-glucose into intracellular metabolites in MS5 alone or in co-culture with SKM1
Source data										Statistics
	MS-5 only			MS-5 co-culture
Acetate C2	2.50442	1.42918	1.35856	5.04803	2.1748	1.902				Table Analyzed	Acetate C2		Table Analyzed	Alanine C3		Table Analyzed	Lactate C3
Alanine C3	4.20423	7.12269	5.38543	7.98658	6.09001	7.62531
Lactate C3	5.0033	6.76197	4.78683	8.04532	8.7404	7.15715				Column B	MS-5 co-culture		Column B	MS-5 co-culture		Column B	MS-5 co-culture
										vs.	vs,		vs.	vs,		vs.	vs,
										Column A	MS-5 only		Column A	MS-5 only		Column A	MS-5 only
										Unpaired t test			Unpaired t test			Unpaired t test
										P value	0.2994		P value	0.1809		P value	0.0336
										P value summary	ns		P value summary	ns		P value summary	*
										Significantly different (P < 0.05)?	No		Significantly different (P < 0.05)?	No		Significantly different (P < 0.05)?	Yes
										One- or two-tailed P value?	Two-tailed		One- or two-tailed P value?	Two-tailed		One- or two-tailed P value?	Two-tailed
										t, df	t=1,191, df=4		t, df	t=1,618, df=4		t, df	t=3,178, df=4
										How big is the difference?			How big is the difference?			How big is the difference?
										Mean of column A	1.764		Mean of column A	5.571		Mean of column A	5.517
										Mean of column B	3.042		Mean of column B	7.234		Mean of column B	7.981
										Difference between means (B - A) ± SEM	1,278 ± 1,072		Difference between means (B - A) ± SEM	1,663 ± 1,028		Difference between means (B - A) ± SEM	2,464 ± 0,7753
										95% confidence interval	-1,700 to 4,255		95% confidence interval	-1,190 to 4,517		95% confidence interval	0,3110 to 4,616
										R squared (eta squared)	0.2619		R squared (eta squared)	0.3956		R squared (eta squared)	0.7163
										F test to compare variances			F test to compare variances			F test to compare variances
										F, DFn, Dfd	7,367, 2, 2		F, DFn, Dfd	2,125, 2, 2		F, DFn, Dfd	1,863, 2, 2
										P value	0.239		P value	0.64		P value	0.6985
										P value summary	ns		P value summary	ns		P value summary	ns
										Significantly different (P < 0.05)?	No		Significantly different (P < 0.05)?	No		Significantly different (P < 0.05)?	No
										Data analyzed			Data analyzed			Data analyzed
										Sample size, column A	3		Sample size, column A	3		Sample size, column A	3
										Sample size, column B	3		Sample size, column B	3		Sample size, column B	3
