# Supplementary material for: Crosstalk between AML and stromal cells triggers acetate secretion through the metabolic rewiring of stromal cells
Source: eLife journal article supplement (doi:10.7554/elife.75908), 2022-09-02
Supplement: supp [file elife-75908-supp-v2.zip › elife_poa_e75908_Figure_4_figure_supplement_1_source_data_1.xlsx]

## Sheet: Fig 4 Supl 1a
Acetate levels in MS5 cells in thiamine-free medium vs control
Source data									Statistics
	MS-5 control medium			MS-5 Thiamine free medium					Table Analyzed	MS5 Thiamine
Norm acetate intensity	7.21029	8.11229	4.03564	11.1766	10.3099	5.4144
									Column B	MS-5 Thiamine free medium
									vs.	vs,
									Column A	MS-5 control medium
									Unpaired t test
									P value	0.3127
									P value summary	ns
									Significantly different (P < 0.05)?	No
									One- or two-tailed P value?	Two-tailed
									t, df	t=1,154, df=4
									How big is the difference?
									Mean of column A	6.453
									Mean of column B	8.967
									Difference between means (B - A) ± SEM	2,514 ± 2,179
									95% confidence interval	-3,534 to 8,563
									R squared (eta squared)	0.2498
									F test to compare variances
									F, DFn, Dfd	2,105, 2, 2
									P value	0.6441
									P value summary	ns
									Significantly different (P < 0.05)?	No
									Data analyzed
									Sample size, column A	3
									Sample size, column B	3

## Sheet: Fig 4 Supl 1b
Acetate levels in Kasumi and HL-60 +/- NAC or H2O2 alone vs coculture
Source data
	Kasumi only			HL-60 only			MS-5 + Kasumi			MS-5 + HL-60
Control	0.723166	0.681293	0.735815	2.8838	0.786784	2.43338	44.1219	38.1345	30.2281	59.3974	62.3775	72.0385
H2O2	0.813805	1.04715	1.01589	n.a.	n.a.	n.a.	64.5719	63.414	54.9083	n.a.	n.a.	n.a.
NAC	1.30809	1.27017	1.35388	2.50161	2.23967	2.70256	34.8062	32.2856	25.1007	39.6888	37.539	33.2865
Statistics
Within each column, compare rows (simple effects within columns)											Compare each cell mean with the other cell mean in that column
Number of families	2										Number of families	1
Number of comparisons per family	2										Number of comparisons per family	2
Alpha	0.05										Alpha	0.05
Dunnett's multiple comparisons test	Mean Diff,	95,00% CI of diff,	Significant?	Summary	Adjusted P Value						Sidak's multiple comparisons test	Mean Diff,	95,00% CI of diff,	Significant?	Summary	Adjusted P Value
Kasumi only											Control - NAC
Control vs. H2O2	-0.2455	-8,662 to 8,171	No	ns	0.9961						HL-60 only	-0.4466	-8,794 to 7,901	No	ns	0.9872
Control vs. NAC	-0.5973	-9,013 to 7,819	No	ns	0.9772						MS-5 + HL-60	27.77	19,42 to 36,11	Yes	****	<0,0001
MS-5 + Kasumi
Control vs. H2O2	-23.47	-31,89 to -15,05	Yes	****	<0,0001						Test details	Mean 1	Mean 2	Mean Diff,	SE of diff,	N1	N2	t	DF
Control vs. NAC	6.764	-1,652 to 15,18	No	ns	0.1177
											Control - NAC
											HL-60 only	2.035	2.481	-0.4466	3.043	3	3	0.1468	8
Test details	Mean 1	Mean 2	Mean Diff,	SE of diff,	N1	N2	q	DF			MS-5 + HL-60	64.6	36.84	27.77	3.043	3	3	9.125	8
Kasumi only
Control vs. H2O2	0.7134	0.959	-0.2455	3.363	3	3	0.07301	12
Control vs. NAC	0.7134	1.311	-0.5973	3.363	3	3	0.1776	12
MS-5 + Kasumi
Control vs. H2O2	37.49	60.96	-23.47	3.363	3	3	6.979	12
Control vs. NAC	37.49	30.73	6.764	3.363	3	3	2.011	12

## Sheet: Fig 4 Supl 1c
Acetate secretion in MS-5 cells with different concentrations of catalase
Source data
	Control			100uM catalase			500uM catalase
MS-5 only	1.15952	0.689563	1.15092	1.17186	1.1201	0.708038	0.981741	1.02881	0.989452
MS-5 + SKM-1	2.37725	2.5442	2.05687	1.8514	1.8653	1.91901	1.5376	1.68212	1.5035
Statistics
Table Analyzed	SKM1 Catalase 100 500 Norm			Table Analyzed	SKM1 Catalase 100 500 Norm			Table Analyzed	SKM1 Catalase 100 500 Norm
Column B	MS-5 + SKM-1			Column D	MS-5 + SKM-1 catalase 100			Column F	MS-5 + SKM-1 catalase 500
vs.	vs,			vs.	vs,			vs.	vs,
Column A	MS-5 only			Column C	MS-5 only catalase 100			Column E	MS-5 only catalase 500
Unpaired t test with Welch's correction				Unpaired t test with Welch's correction				Unpaired t test with Welch's correction
P value	0.0034			P value	0.0249			P value	0.006
P value summary	**			P value summary	*			P value summary	**
Significantly different (P < 0.05)?	Yes			Significantly different (P < 0.05)?	Yes			Significantly different (P < 0.05)?	Yes
One- or two-tailed P value?	Two-tailed			One- or two-tailed P value?	Two-tailed			One- or two-tailed P value?	Two-tailed
Welch-corrected t, df	t=6,283, df=3,973			Welch-corrected t, df	t=5,929, df=2,079			Welch-corrected t, df	t=10,14, df=2,282
How big is the difference?				How big is the difference?				How big is the difference?
Mean of column A	1			Mean of column C	1			Mean of column E	1
Mean of column B	2.326			Mean of column D	1.879			Mean of column F	1.574
Difference between means (B - A) ± SEM	1,326 ± 0,2111			Difference between means (D - C) ± SEM	0,8786 ± 0,1482			Difference between means (F - E) ± SEM	0,5744 ± 0,05666
95% confidence interval	0,7386 to 1,914			95% confidence interval	0,2636 to 1,494			95% confidence interval	0,3573 to 0,7915
R squared (eta squared)	0.9086			R squared (eta squared)	0.9442			R squared (eta squared)	0.9783
F test to compare variances				F test to compare variances				F test to compare variances
F, DFn, Dfd	1,179, 2, 2			F, DFn, Dfd	50,67, 2, 2			F, DFn, Dfd	14,11, 2, 2
P value	0.918			P value	0.0387			P value	0.1323
P value summary	ns			P value summary	*			P value summary	ns
Significantly different (P < 0.05)?	No			Significantly different (P < 0.05)?	Yes			Significantly different (P < 0.05)?	No
Data analyzed				Data analyzed				Data analyzed
Sample size, column A	3			Sample size, column C	3			Sample size, column E	3
Sample size, column B	3			Sample size, column D	3			Sample size, column F	3
