# Supplementary material for: Crosstalk between AML and stromal cells triggers acetate secretion through the metabolic rewiring of stromal cells
Source: eLife journal article supplement (doi:10.7554/elife.75908), 2022-09-02
Supplement: supp [file elife-75908-supp-v2.zip › elife_poa_e75908_Figure_4_source_data_1.xlsx]

## Sheet: Fig 4a
Acetate levels with H2O2 and NAC
Source data												Statistics
	SKM-1 only			MS-5 only			Co-culture
Ctl	1.00439	0.476447	0.828156	12.2873	9.52995	15.4084	28.5288	18.0747	34.041
H2O2	1.10985	1.05496	1.02962	12.6195	21.5632	14.4668	34.7681	44.9103	40.2454			Within each column, compare rows (simple effects within columns)
NAC	2.07779	1.67707	1.76428	6.16862	8.59613	6.40963	13.6602	17.4086	15.8772
												Number of families	3
												Number of comparisons per family	2
												Alpha	0.05
												Dunnett's multiple comparisons test	Mean Diff,	95,00% CI of diff,	Significant?	Summary	Adjusted P Value
												SKM-1 only
												Ctl vs. H2O2	-0.2951	-6,108 to 5,517	No	ns	0.9892
												Ctl vs. NAC	-1.07	-6,883 to 4,743	No	ns	0.8694
												MS-5 only
												Ctl vs. H2O2	-3.808	-9,621 to 2,005	No	ns	0.227
												Ctl vs. NAC	5.35	-0,4622 to 11,16	No	ns	0.0727
												Co-culture
												Ctl vs. H2O2	-15.39	-21,20 to -9,579	Yes	****	<0,0001
												Ctl vs. NAC	8.926	3,114 to 14,74	Yes	**	0.0032
												Test details	Mean 1	Mean 2	Mean Diff,	SE of diff,	N1	N2	q	DF
												SKM-1 only
												Ctl vs. H2O2	0.7697	1.065	-0.2951	2.423	3	3	0.1218	18
												Ctl vs. NAC	0.7697	1.84	-1.07	2.423	3	3	0.4416	18
												MS-5 only
												Ctl vs. H2O2	12.41	16.22	-3.808	2.423	3	3	1.571	18
												Ctl vs. NAC	12.41	7.058	5.35	2.423	3	3	2.208	18
												Co-culture
												Ctl vs. H2O2	24.57	39.97	-15.39	2.423	3	3	6.352	18
												Ctl vs. NAC	24.57	15.65	8.926	2.423	3	3	3.684	18

## Sheet: 4b
DCFDA ROS in AML cell lines in co-culture
Source data
	SKM-1			SKM-1 co-culture			Kasumi-1			Kasumi-1 co-culture			HL-60			HL-60 co-culture
DCFDA Norm geom mean	1	1	1	0.460694	0.546763	0.509955	1	1	1	0.741722	0.596479	0.637589	1	1	1	0.685606	0.606868	0.517579
DCFDA ROS in MS-5 co-cultured with AML cell lines
	MS-5 only			MS-5 co-culture (SKM-1)			MS-5 only			MS-5 co-culture (Kasumi-1)			MS-5 only			MS-5 co-culture (HL-60)
DCFDA Norm geom mean	1	1	1	1.30263	1.39655	1.22511	1	1	1	1.5614	2.26786	1.93467	1	1	1	1.13577	1.04692	0.936652
Statistics
Table Analyzed	ROS AML direct				Table Analyzed	ROS MS5 direct
Column B	SKM-1 co-culture				Column B	MS-5 co-culture (SKM-1)
vs.	vs,				vs.	vs,
Column A	SKM-1				Column A	MS-5 only
Unpaired t test with Welch's correction					Unpaired t test with Welch's correction
P value	0.0025				P value	0.0249
P value summary	**				P value summary	*
Significantly different (P < 0.05)?	Yes				Significantly different (P < 0.05)?	Yes
One- or two-tailed P value?	Two-tailed				One- or two-tailed P value?	Two-tailed
Welch-corrected t, df	t=19,82, df=2,000				Welch-corrected t, df	t=6,216, df=2,000
How big is the difference?					How big is the difference?
Mean of column A	1				Mean of column A	1
Mean of column B	0.5058				Mean of column B	1.308
Difference between means (B - A) ± SEM	-0,4942 ± 0,02493				Difference between means (B - A) ± SEM	0,3081 ± 0,04957
95% confidence interval	-0,6015 to -0,3869				95% confidence interval	0,09483 to 0,5214
R squared (eta squared)	0.9949				R squared (eta squared)	0.9508
F test to compare variances					F test to compare variances
F, DFn, Dfd	Infinity, 2, 2				F, DFn, Dfd	Infinity, 2, 2
P value	<0,0001				P value	<0,0001
P value summary	****				P value summary	****
Significantly different (P < 0.05)?	Yes				Significantly different (P < 0.05)?	Yes
Data analyzed					Data analyzed
Sample size, column A	3				Sample size, column A	3
Sample size, column B	3				Sample size, column B	3
Table Analyzed	ROS AML direct				Table Analyzed	ROS MS5 direct
Column D	Kasumi-1 co-culture				Column D	MS-5 co-culture (Kasumi-1)
vs.	vs,				vs.	vs,
Column C	Kasumi-1				Column C	MS-5 only
Unpaired t test with Welch's correction					Unpaired t test with Welch's correction
P value	0.0157				P value	0.0457
P value summary	*				P value summary	*
Significantly different (P < 0.05)?	Yes				Significantly different (P < 0.05)?	Yes
One- or two-tailed P value?	Two-tailed				One- or two-tailed P value?	Two-tailed
Welch-corrected t, df	t=7,899, df=2,000				Welch-corrected t, df	t=4,515, df=2,000
How big is the difference?					How big is the difference?
Mean of column C	1				Mean of column C	1
Mean of column D	0.6586				Mean of column D	1.921
Difference between means (D - C) ± SEM	-0,3414 ± 0,04322				Difference between means (D - C) ± SEM	0,9213 ± 0,2040
95% confidence interval	-0,5274 to -0,1554				95% confidence interval	0,04338 to 1,799
R squared (eta squared)	0.9689				R squared (eta squared)	0.9107
F test to compare variances					F test to compare variances
F, DFn, Dfd	Infinity, 2, 2				F, DFn, Dfd	Infinity, 2, 2
P value	<0,0001				P value	<0,0001
P value summary	****				P value summary	****
Significantly different (P < 0.05)?	Yes				Significantly different (P < 0.05)?	Yes
Data analyzed					Data analyzed
Sample size, column C	3				Sample size, column C	3
Sample size, column D	3				Sample size, column D	3
Table Analyzed	ROS AML direct				Table Analyzed	ROS MS5 direct
Column F	HL-60 co-culture				Column F	MS-5 co-culture (HL-60)
vs.	vs,				vs.	vs,
Column E	HL-60				Column E	MS-5 only
Unpaired t test with Welch's correction					Unpaired t test with Welch's correction
P value	0.0146				P value	0.5611
P value summary	*				P value summary	ns
Significantly different (P < 0.05)?	Yes				Significantly different (P < 0.05)?	No
One- or two-tailed P value?	Two-tailed				One- or two-tailed P value?	Two-tailed
Welch-corrected t, df	t=8,172, df=2,000				Welch-corrected t, df	t=0,6907, df=2,000
How big is the difference?					How big is the difference?
Mean of column E	1				Mean of column E	1
Mean of column F	0.6034				Mean of column F	1.04
Difference between means (F - E) ± SEM	-0,3966 ± 0,04854				Difference between means (F - E) ± SEM	0,03978 ± 0,05759
95% confidence interval	-0,6055 to -0,1878				95% confidence interval	-0,2080 to 0,2876
R squared (eta squared)	0.9709				R squared (eta squared)	0.1926
F test to compare variances					F test to compare variances
F, DFn, Dfd	Infinity, 2, 2				F, DFn, Dfd	Infinity, 2, 2
P value	<0,0001				P value	<0,0001
P value summary	****				P value summary	****
Significantly different (P < 0.05)?	Yes				Significantly different (P < 0.05)?	Yes
Data analyzed					Data analyzed
Sample size, column E	3				Sample size, column E	3
Sample size, column F	3				Sample size, column F	3

## Sheet: 4c
DCFDA ROS in primary AML in co-culture
Source data	AML5		AML6		AML7
	Only	Co-culture	Only	Co-culture	Only	Co-culture
DCFDA Norm geom mean	1	0.242496	1	0.316195	1	0.110148
DCFDA ROS in MS-5 co-cultured with primary AML cells
	MS-5 (AML5)		MS-5 (AML6)		MS-5 (AML7)
	Only	Co-culture	Only	Co-culture	Only	Co-culture
DCFDA Norm geom mean	1	1.35484	1	1.48139	1	1.06948

## Sheet: 4d
DCFDA ROS in AML cell lines in co-culture with permeable membrane
Source data
	SKM-1			SKM-1 co-culture			Kasumi-1			Kasumi-1 co-culture			HL-60			HL-60 co-culture
DCFDA Norm geom mean	1	1	1	0.985121	0.955606	0.934927	1	1	1	1.36364	1.00917	0.934524	1	1	1	0.979287	1.20896	1.09271
DCFDA ROS in MS-5 co-cultured (permeable membrane) with AML cell lines
	MS-5 only			MS-5 co-culture (SKM-1)			MS-5 only			MS-5 co-culture (Kasumi-1)			MS-5 only			MS-5 co-culture (HL-60)
DCFDA Norm geom mean	1	1	1	1.31169	1.26515	0.900621	1	1	1	1.37209	0.964758	1.31214	1	1	1	1.09155	1.24053	0.916519
Statistics
Table Analyzed	ROS AML thincert				Table Analyzed	ROS MS5 thincert
Column B	SKM-1 co-culture				Column B	MS-5 co-culture (SKM-1)
vs.	vs,				vs.	vs,
Column A	SKM-1				Column A	MS-5 only
Unpaired t test with Welch's correction					Unpaired t test with Welch's correction
P value	0.1045				P value	0.3454
P value summary	ns				P value summary	ns
Significantly different (P < 0.05)?	No				Significantly different (P < 0.05)?	No
One- or two-tailed P value?	Two-tailed				One- or two-tailed P value?	Two-tailed
Welch-corrected t, df	t=2,846, df=2,000				Welch-corrected t, df	t=1,225, df=2,000
How big is the difference?					How big is the difference?
Mean of column A	1				Mean of column A	1
Mean of column B	0.9586				Mean of column B	1.159
Difference between means (B - A) ± SEM	-0,04145 ± 0,01456				Difference between means (B - A) ± SEM	0,1592 ± 0,1300
95% confidence interval	-0,1041 to 0,02122				95% confidence interval	-0,4000 to 0,7183
R squared (eta squared)	0.802				R squared (eta squared)	0.4285
F test to compare variances					F test to compare variances
F, DFn, Dfd	Infinity, 2, 2				F, DFn, Dfd	Infinity, 2, 2
P value	<0,0001				P value	<0,0001
P value summary	****				P value summary	****
Significantly different (P < 0.05)?	Yes				Significantly different (P < 0.05)?	Yes
Data analyzed					Data analyzed
Sample size, column A	3				Sample size, column A	3
Sample size, column B	3				Sample size, column B	3
Table Analyzed	ROS AML thincert				Table Analyzed	ROS MS5 thincert
Column D	Kasumi-1 co-culture				Column D	MS-5 co-culture (Kasumi-1)
vs.	vs,				vs.	vs,
Column C	Kasumi-1				Column C	MS-5 only
Unpaired t test with Welch's correction					Unpaired t test with Welch's correction
P value	0.5199				P value	0.2305
P value summary	ns				P value summary	ns
Significantly different (P < 0.05)?	No				Significantly different (P < 0.05)?	No
One- or two-tailed P value?	Two-tailed				One- or two-tailed P value?	Two-tailed
Welch-corrected t, df	t=0,7740, df=2,000				Welch-corrected t, df	t=1,704, df=2,000
How big is the difference?					How big is the difference?
Mean of column C	1				Mean of column C	1
Mean of column D	1.102				Mean of column D	1.216
Difference between means (D - C) ± SEM	0,1024 ± 0,1324				Difference between means (D - C) ± SEM	0,2163 ± 0,1270
95% confidence interval	-0,4671 to 0,6720				95% confidence interval	-0,3300 to 0,7626
R squared (eta squared)	0.2305				R squared (eta squared)	0.5921
F test to compare variances					F test to compare variances
F, DFn, Dfd	Infinity, 2, 2				F, DFn, Dfd	Infinity, 2, 2
P value	<0,0001				P value	<0,0001
P value summary	****				P value summary	****
Significantly different (P < 0.05)?	Yes				Significantly different (P < 0.05)?	Yes
Data analyzed					Data analyzed
Sample size, column C	3				Sample size, column C	3
Sample size, column D	3				Sample size, column D	3
Table Analyzed	ROS AML thincert				Table Analyzed	ROS MS5 thincert
Column F	HL-60 co-culture				Column F	MS-5 co-culture (HL-60)
vs.	vs,				vs.	vs,
Column E	HL-60				Column E	MS-5 only
Unpaired t test with Welch's correction					Unpaired t test with Welch's correction
P value	0.2933				P value	0.4695
P value summary	ns				P value summary	ns
Significantly different (P < 0.05)?	No				Significantly different (P < 0.05)?	No
One- or two-tailed P value?	Two-tailed				One- or two-tailed P value?	Two-tailed
Welch-corrected t, df	t=1,412, df=2,000				Welch-corrected t, df	t=0,8850, df=2,000
How big is the difference?					How big is the difference?
Mean of column E	1				Mean of column E	1
Mean of column F	1.094				Mean of column F	1.083
Difference between means (F - E) ± SEM	0,09365 ± 0,06630				Difference between means (F - E) ± SEM	0,08287 ± 0,09364
95% confidence interval	-0,1916 to 0,3789				95% confidence interval	-0,3200 to 0,4858
R squared (eta squared)	0.4994				R squared (eta squared)	0.2814
F test to compare variances					F test to compare variances
F, DFn, Dfd	Infinity, 2, 2				F, DFn, Dfd	Infinity, 2, 2
P value	<0,0001				P value	<0,0001
P value summary	****				P value summary	****
Significantly different (P < 0.05)?	Yes				Significantly different (P < 0.05)?	Yes
Data analyzed					Data analyzed
Sample size, column E	3				Sample size, column E	3
Sample size, column F	3				Sample size, column F	3
