# Supplementary material for: Crosstalk between AML and stromal cells triggers acetate secretion through the metabolic rewiring of stromal cells
Source: eLife journal article supplement (doi:10.7554/elife.75908), 2022-09-02
Supplement: supp [file elife-75908-supp-v2.zip › elife_poa_e75908_Figure_5_figure_supplement_1_source_data_1.xlsx]

## Sheet: Fig 5 Supl 1b
% of Calcein-AM + CD33 cells with CBX
Source data
	SKM-1			Kasumi-1			HL-60
Control	87.8	88.6	91.2	97.3	95.7	96	98.4	97.5	97.8
CBX	19.8	20.3	20.7	10.9	14	11.5	28.6	20.4	31.6
Statistics
Table Analyzed	% Calcein CD33 CBX		Table Analyzed	% Calcein CD33 CBX		Table Analyzed	% Calcein CD33 CBX
Column B	SKM-1 CBX		Column D	Kasumi-1 CBX		Column F	HL-60 CBX
vs.	vs,		vs.	vs,		vs.	vs,
Column A	SKM-1		Column C	Kasumi-1		Column E	HL-60
Unpaired t test			Unpaired t test			Unpaired t test
P value	<0,0001		P value	<0,0001		P value	<0,0001
P value summary	****		P value summary	****		P value summary	****
Significantly different (P < 0.05)?	Yes		Significantly different (P < 0.05)?	Yes		Significantly different (P < 0.05)?	Yes
One- or two-tailed P value?	Two-tailed		One- or two-tailed P value?	Two-tailed		One- or two-tailed P value?	Two-tailed
t, df	t=65,10, df=4		t, df	t=78,78, df=4		t, df	t=21,16, df=4
How big is the difference?			How big is the difference?			How big is the difference?
Mean of column A	89.2		Mean of column C	96.33		Mean of column E	97.9
Mean of column B	20.27		Mean of column D	12.13		Mean of column F	26.87
Difference between means (B - A) ± SEM	-68,93 ± 1,059		Difference between means (D - C) ± SEM	-84,20 ± 1,069		Difference between means (F - E) ± SEM	-71,03 ± 3,358
95% confidence interval	-71,87 to -65,99		95% confidence interval	-87,17 to -81,23		95% confidence interval	-80,36 to -61,71
R squared (eta squared)	0.9991		R squared (eta squared)	0.9994		R squared (eta squared)	0.9911
F test to compare variances			F test to compare variances			F test to compare variances
F, DFn, Dfd	15,54, 2, 2		F, DFn, Dfd	3,737, 2, 2		F, DFn, Dfd	160,1, 2, 2
P value	0.1209		P value	0.4222		P value	0.0124
P value summary	ns		P value summary	ns		P value summary	*
Significantly different (P < 0.05)?	No		Significantly different (P < 0.05)?	No		Significantly different (P < 0.05)?	Yes
Data analyzed			Data analyzed			Data analyzed
Sample size, column A	3		Sample size, column C	3		Sample size, column E	3
Sample size, column B	3		Sample size, column D	3		Sample size, column F	3
