# Supplementary material for: Crosstalk between AML and stromal cells triggers acetate secretion through the metabolic rewiring of stromal cells
Source: eLife journal article supplement (doi:10.7554/elife.75908), 2022-09-02
Supplement: supp [file elife-75908-supp-v2.zip › elife_poa_e75908_Figure_5_source_data_1.xlsx]

## Sheet: Fig5a
Log2FC expression of gap junction genes in MS-5 cells cultured alone vs co-culture
	MS-5 only vs. co-culture
Gene	Log2FC
Gja1	-0.400911
Gja5	1.19674
Gja8	0.512517
Gjb3	-0.330904
Gjb4	0.109697
Gjb5	0.764211
Gjc1	-0.0267668
Gjc2	0.329925

## Sheet: 5b
Calcein-AM incorporation into AML cell lines in co-culture with MS-5
	SKM-1			Kasumi-1			HL-60
%of Calcein-AM+/CD33+ cells	87.8	88.6	91.2	94.2	91.7	94.7	98.3	93.4	95.2
Control without calcein	SKM-1 no calcein			Kasumi no calcein			HL-60 no calcein
%of Calcein-AM+/CD33+ cells	0.21	1.02	1.47	0.33	0.06	1.08	0.05	0.02	0.03

## Sheet: 5c
Calcein-AM incorporation into AML cell lines in co-culture with MS-5 with CBX
Source data												Statistics
	SKM-1			Kasumi			HL-60
Control	1	1.05263	0.947368	1.03648	0.997854	0.965665	1.04738	0.965087	0.987531			Table Analyzed	Copy of Geo mean		Table Analyzed	Copy of Geo mean		Table Analyzed	Copy of Geo mean
CBX	0.647368	0.67218	0.715789	0.367597	0.379828	0.370172	0.416708	0.377057	0.418204
												Column B	SKM-1 CBX		Column D	Kasumi CBX		Column F	HL-60 CBX
												vs.	vs,		vs.	vs,		vs.	vs,
												Column A	SKM-1		Column C	Kasumi		Column E	HL-60
												Unpaired t test			Unpaired t test			Unpaired t test
												P value	0.0009		P value	<0,0001		P value	<0,0001
												P value summary	***		P value summary	****		P value summary	****
												Significantly different (P < 0.05)?	Yes		Significantly different (P < 0.05)?	Yes		Significantly different (P < 0.05)?	Yes
												One- or two-tailed P value?	Two-tailed		One- or two-tailed P value?	Two-tailed		One- or two-tailed P value?	Two-tailed
												t, df	t=8,839, df=4		t, df	t=30,16, df=4		t, df	t=21,28, df=4
												How big is the difference?			How big is the difference?			How big is the difference?
												Mean of column A	1		Mean of column C	1		Mean of column E	1
												Mean of column B	0.6784		Mean of column D	0.3725		Mean of column F	0.404
												Difference between means (B - A) ± SEM	-0,3216 ± 0,03638		Difference between means (D - C) ± SEM	-0,6275 ± 0,02081		Difference between means (F - E) ± SEM	-0,5960 ± 0,02801
												95% confidence interval	-0,4226 to -0,2206		95% confidence interval	-0,6852 to -0,5697		95% confidence interval	-0,6738 to -0,5182
												R squared (eta squared)	0.9513		R squared (eta squared)	0.9956		R squared (eta squared)	0.9912
												F test to compare variances			F test to compare variances			F test to compare variances
												F, DFn, Dfd	2,309, 2, 2		F, DFn, Dfd	30,23, 2, 2		F, DFn, Dfd	3,323, 2, 2
												P value	0.6045		P value	0.064		P value	0.4626
												P value summary	ns		P value summary	ns		P value summary	ns
												Significantly different (P < 0.05)?	No		Significantly different (P < 0.05)?	No		Significantly different (P < 0.05)?	No
												Data analyzed			Data analyzed			Data analyzed
												Sample size, column A	3		Sample size, column C	3		Sample size, column E	3
												Sample size, column B	3		Sample size, column D	3		Sample size, column F	3

## Sheet: 5d
ROS in AML cell lines alone vs coculture +/- CBX
Source data
	SKM-1 only			SKM-1 co-cult susp			SKM-1 only CBX			SKM-1 co-cult susp CBX			Kasumi only			Kasumi co-cult susp			Kasumi only CBX			Kasumi co-cult susp CBX			HL60 only			HL60 co-cult susp			HL60 only CBX			HL60 co-cult susp CBX
DCFDA geom mean	1	1	1	0.646939	0.543721	0.601	1	1	1	1.08915	0.965074	0.935764	1	1	1	0.733188	0.772246	0.733493	1	1	1	1.06527	1.10581	1.03405	1	1	1	0.548863	0.785487	0.728896	1	1	1	0.970323	1.00786	0.99095
Statistics
Table Analyzed	ROS SKM-1 CBX			Table Analyzed	ROS Kasumi CBX			Table Analyzed	ROS HL-60 CBX
Column B	SKM-1 co-cult susp			Column B	Kasumi co-cult susp			Column B	HL60 co-cult susp
vs.	vs,			vs.	vs,			vs.	vs,
Column A	SKM-1 only			Column A	Kasumi only			Column A	HL60 only
Unpaired t test with Welch's correction				Unpaired t test with Welch's correction				Unpaired t test with Welch's correction
P value	0.0054			P value	0.0026			P value	0.0484
P value summary	**			P value summary	**			P value summary	*
Significantly different (P < 0.05)?	Yes			Significantly different (P < 0.05)?	Yes			Significantly different (P < 0.05)?	Yes
One- or two-tailed P value?	Two-tailed			One- or two-tailed P value?	Two-tailed			One- or two-tailed P value?	Two-tailed
Welch-corrected t, df	t=13,49, df=2,000			Welch-corrected t, df	t=19,56, df=2,000			Welch-corrected t, df	t=4,377, df=2,000
How big is the difference?				How big is the difference?				How big is the difference?
Mean of column A	1			Mean of column A	1			Mean of column A	1
Mean of column B	0.5972			Mean of column B	0.7463			Mean of column B	0.6877
Difference between means (B - A) ± SEM	-0,4028 ± 0,02986			Difference between means (B - A) ± SEM	-0,2537 ± 0,01297			Difference between means (B - A) ± SEM	-0,3123 ± 0,07134
95% confidence interval	-0,5312 to -0,2743			95% confidence interval	-0,3095 to -0,1979			95% confidence interval	-0,6192 to -0,005306
R squared (eta squared)	0.9891			R squared (eta squared)	0.9948			R squared (eta squared)	0.9055
F test to compare variances				F test to compare variances				F test to compare variances
F, DFn, Dfd	Infinity, 2, 2			F, DFn, Dfd	Infinity, 2, 2			F, DFn, Dfd	Infinity, 2, 2
P value	<0,0001			P value	<0,0001			P value	<0,0001
P value summary	****			P value summary	****			P value summary	****
Significantly different (P < 0.05)?	Yes			Significantly different (P < 0.05)?	Yes			Significantly different (P < 0.05)?	Yes
Data analyzed				Data analyzed				Data analyzed
Sample size, column A	3			Sample size, column A	3			Sample size, column A	3
Sample size, column B	3			Sample size, column B	3			Sample size, column B	3
Table Analyzed	ROS SKM-1 CBX			Table Analyzed	ROS Kasumi CBX			Table Analyzed	ROS HL-60 CBX
Column D	SKM-1 co-cult susp CBX			Column D	Kasumi co-cult susp CBX			Column D	HL60 co-cult susp CBX
vs.	vs,			vs.	vs,			vs.	vs,
Column C	SKM-1 only CBX			Column C	Kasumi only CBX			Column C	HL60 only CBX
Unpaired t test with Welch's correction				Unpaired t test with Welch's correction				Unpaired t test with Welch's correction
P value	0.9499			P value	0.0812			P value	0.4431
P value summary	ns			P value summary	ns			P value summary	ns
Significantly different (P < 0.05)?	No			Significantly different (P < 0.05)?	No			Significantly different (P < 0.05)?	No
One- or two-tailed P value?	Two-tailed			One- or two-tailed P value?	Two-tailed			One- or two-tailed P value?	Two-tailed
Welch-corrected t, df	t=0,07096, df=2,000			Welch-corrected t, df	t=3,292, df=2,000			Welch-corrected t, df	t=0,9481, df=2,000
How big is the difference?				How big is the difference?				How big is the difference?
Mean of column C	1			Mean of column C	1			Mean of column C	1
Mean of column D	0.9967			Mean of column D	1.068			Mean of column D	0.9897
Difference between means (D - C) ± SEM	-0,003336 ± 0,04701			Difference between means (D - C) ± SEM	0,06838 ± 0,02077			Difference between means (D - C) ± SEM	-0,01029 ± 0,01085
95% confidence interval	-0,2056 to 0,1989			95% confidence interval	-0,02100 to 0,1578			95% confidence interval	-0,05699 to 0,03641
R squared (eta squared)	0.002511			R squared (eta squared)	0.8442			R squared (eta squared)	0.3101
F test to compare variances				F test to compare variances				F test to compare variances
F, DFn, Dfd	Infinity, 2, 2			F, DFn, Dfd	Infinity, 2, 2			F, DFn, Dfd	Infinity, 2, 2
P value	<0,0001			P value	<0,0001			P value	<0,0001
P value summary	****			P value summary	****			P value summary	****
Significantly different (P < 0.05)?	Yes			Significantly different (P < 0.05)?	Yes			Significantly different (P < 0.05)?	Yes
Data analyzed				Data analyzed				Data analyzed
Sample size, column C	3			Sample size, column C	3			Sample size, column C	3
Sample size, column D	3			Sample size, column D	3			Sample size, column D	3

## Sheet: 5e
ROS in MS5 cells co-cultured with AML cell lines +/- CBX
Source data
	MS-5 only			MS5 cocult SKM1 ctl			MS5 only CBX			MS5 cocult SKM1 CBX			MS-5 only			MS5 cocult Kasumi ctl			MS5 only CBX			MS5 cocult Kasumi CBX			MS-5 only			MS5 cocult HL-60 ctl			MS5 only CBX			MS5 cocult HL-60 CBX
DCFDA geom mean	1	1	1	1.208	1.29178	1.30126	1	1	1	1.06901	1.10526	0.858252	1	1	1	1.67639	1.62791	1.70468	1	1	1	1.11976	1.16232	1.0463	1	1	1	1.2093	1.35714	1.35227	1	1	1	0.973239	1.09421	0.983025
Statistics
Table Analyzed	ROS MS5 (SKM-1) CBX			Table Analyzed	ROS MS5 (Kasumi) CBX			Table Analyzed	ROS MS5 (HL60) CBX
Column B	MS5 cocult ctl			Column B	MS5 cocult ctl			Column B	MS5 cocult ctl
vs.	vs,			vs.	vs,			vs.	vs,
Column A	MS-5 only ctl			Column A	MS-5 only ctl			Column A	MS-5 only ctl
Unpaired t test with Welch's correction				Unpaired t test with Welch's correction				Unpaired t test with Welch's correction
P value	0.0121			P value	0.0011			P value	0.0242
P value summary	*			P value summary	**			P value summary	*
Significantly different (P < 0.05)?	Yes			Significantly different (P < 0.05)?	Yes			Significantly different (P < 0.05)?	Yes
One- or two-tailed P value?	Two-tailed			One- or two-tailed P value?	Two-tailed			One- or two-tailed P value?	Two-tailed
Welch-corrected t, df	t=9,011, df=2,000			Welch-corrected t, df	t=29,87, df=2,000			Welch-corrected t, df	t=6,316, df=2,000
How big is the difference?				How big is the difference?				How big is the difference?
Mean of column A	1			Mean of column A	1			Mean of column A	1
Mean of column B	1.267			Mean of column B	1.67			Mean of column B	1.306
Difference between means (B - A) ± SEM	0,2670 ± 0,02963			Difference between means (B - A) ± SEM	0,6697 ± 0,02242			Difference between means (B - A) ± SEM	0,3062 ± 0,04849
95% confidence interval	0,1395 to 0,3945			95% confidence interval	0,5732 to 0,7661			95% confidence interval	0,09761 to 0,5149
R squared (eta squared)	0.976			R squared (eta squared)	0.9978			R squared (eta squared)	0.9523
F test to compare variances				F test to compare variances				F test to compare variances
F, DFn, Dfd	Infinity, 2, 2			F, DFn, Dfd	Infinity, 2, 2			F, DFn, Dfd	Infinity, 2, 2
P value	<0,0001			P value	<0,0001			P value	<0,0001
P value summary	****			P value summary	****			P value summary	****
Significantly different (P < 0.05)?	Yes			Significantly different (P < 0.05)?	Yes			Significantly different (P < 0.05)?	Yes
Data analyzed				Data analyzed				Data analyzed
Sample size, column A	3			Sample size, column A	3			Sample size, column A	3
Sample size, column B	3			Sample size, column B	3			Sample size, column B	3
Table Analyzed	ROS MS5 (SKM-1) CBX			Table Analyzed	ROS MS5 (Kasumi) CBX			Table Analyzed	ROS MS5 (HL60) CBX
Column D	MS5 cocult CBX			Column D	MS5 cocult CBX			Column D	MS5 cocult CBX
vs.	vs,			vs.	vs,			vs.	vs,
Column C	MS5 only CBX			Column C	MS5 only CBX			Column C	MS5 only CBX
Unpaired t test with Welch's correction				Unpaired t test with Welch's correction				Unpaired t test with Welch's correction
P value	0.9009			P value	0.084			P value	0.7068
P value summary	ns			P value summary	ns			P value summary	ns
Significantly different (P < 0.05)?	No			Significantly different (P < 0.05)?	No			Significantly different (P < 0.05)?	No
One- or two-tailed P value?	Two-tailed			One- or two-tailed P value?	Two-tailed			One- or two-tailed P value?	Two-tailed
Welch-corrected t, df	t=0,1408, df=2,000			Welch-corrected t, df	t=3,230, df=2,000			Welch-corrected t, df	t=0,4337, df=2,000
How big is the difference?				How big is the difference?				How big is the difference?
Mean of column C	1			Mean of column C	1			Mean of column C	1
Mean of column D	1.011			Mean of column D	1.109			Mean of column D	1.017
Difference between means (D - C) ± SEM	0,01084 ± 0,07701			Difference between means (D - C) ± SEM	0,1095 ± 0,03389			Difference between means (D - C) ± SEM	0,01683 ± 0,03880
95% confidence interval	-0,3205 to 0,3422			95% confidence interval	-0,03635 to 0,2553			95% confidence interval	-0,1501 to 0,1838
R squared (eta squared)	0.009816			R squared (eta squared)	0.8391			R squared (eta squared)	0.08596
F test to compare variances				F test to compare variances				F test to compare variances
F, DFn, Dfd	Infinity, 2, 2			F, DFn, Dfd	Infinity, 2, 2			F, DFn, Dfd	Infinity, 2, 2
P value	<0,0001			P value	<0,0001			P value	<0,0001
P value summary	****			P value summary	****			P value summary	****
Significantly different (P < 0.05)?	Yes			Significantly different (P < 0.05)?	Yes			Significantly different (P < 0.05)?	Yes
Data analyzed				Data analyzed				Data analyzed
Sample size, column C	3			Sample size, column C	3			Sample size, column C	3
Sample size, column D	3			Sample size, column D	3			Sample size, column D	3

## Sheet: 5f
Acetate levels in AML cells in co-culture +/- CBX
Source data												Statistics
	SKM-1 only			MS-5 only			MS-5 + SKM-1					Table Analyzed	SKM-1 acetate CBX		Table Analyzed	Kasumi acetate CBX		Table Analyzed	HL-60acetate CBX
Control	0.992118	1.00003	0.95693	7.59074	4.51419	7.53443	15.5625	16.6555	13.4652
CBX	0.945286	0.960614	0.927691	5.0942	6.26212	8.15547	4.78782	9.39668	8.73021			Column C	MS-5 + SKM-1		Column C	MS-5 + Kasumi		Column C	MS-5 + HL-60
												vs.	vs,		vs.	vs,		vs.	vs,
												Column A	SKM-1 only		Column A	Kasumi only		Column A	HL-60 only
	Kasumi only			MS-5 only			MS-5 + Kasumi
Control	0.905317	0.916211	0.967029	7.59074	4.51419	7.53443	10.7788	12.3625	13.7151			Unpaired t test			Unpaired t test			Unpaired t test
CBX	0.931845	0.906617	0.966586	5.0942	6.26212	8.15547	9.2927	10.478	7.21043			P value	0.0001		P value	0.0002		P value	0.0027
												P value summary	***		P value summary	***		P value summary	**
												Significantly different (P < 0.05)?	Yes		Significantly different (P < 0.05)?	Yes		Significantly different (P < 0.05)?	Yes
	HL-60 only			MS-5 only			MS-5 + HL-60					One- or two-tailed P value?	Two-tailed		One- or two-tailed P value?	Two-tailed		One- or two-tailed P value?	Two-tailed
Control	0.970282	0.977929	1.01121	7.59074	4.51419	7.53443	10.2828	14.2093	9.10716			t, df	t=15,22, df=4		t, df	t=13,38, df=4		t, df	t=6,621, df=4
CBX	0.983805	1.0187	1.01058	5.0942	6.26212	8.15547	7.80752	8.0067	6.93191
												How big is the difference?			How big is the difference?			How big is the difference?
												Mean of column A	0.983		Mean of column A	0.9295		Mean of column A	0.9865
												Mean of column C	15.23		Mean of column C	12.29		Mean of column C	11.2
												Difference between means (C - A) ± SEM	14,24 ± 0,9361		Difference between means (C - A) ± SEM	11,36 ± 0,8487		Difference between means (C - A) ± SEM	10,21 ± 1,543
												95% confidence interval	11,65 to 16,84		95% confidence interval	8,999 to 13,71		95% confidence interval	5,930 to 14,50
												R squared (eta squared)	0.983		R squared (eta squared)	0.9781		R squared (eta squared)	0.9164
												F test to compare variances			F test to compare variances			F test to compare variances
												F, DFn, Dfd	4993, 2, 2		F, DFn, Dfd	1991, 2, 2		F, DFn, Dfd	15076, 2, 2
												P value	0.0004		P value	0.001		P value	0.0001
												P value summary	***		P value summary	**		P value summary	***
												Significantly different (P < 0.05)?	Yes		Significantly different (P < 0.05)?	Yes		Significantly different (P < 0.05)?	Yes
												Data analyzed			Data analyzed			Data analyzed
												Sample size, column A	3		Sample size, column A	3		Sample size, column A	3
												Sample size, column C	3		Sample size, column C	3		Sample size, column C	3
												Table Analyzed	SKM-1 acetate CBX		Table Analyzed	Kasumi acetate CBX		Table Analyzed	HL-60acetate CBX
												Column C	MS-5 + SKM-1		Column C	MS-5 + Kasumi		Column C	MS-5 + HL-60
												vs.	vs,		vs.	vs,		vs.	vs,
												Column B	MS-5 only		Column B	MS-5 only		Column B	MS-5 only
												Unpaired t test			Unpaired t test			Unpaired t test
												P value	0.0033		P value	0.0093		P value	0.0579
												P value summary	**		P value summary	**		P value summary	ns
												Significantly different (P < 0.05)?	Yes		Significantly different (P < 0.05)?	Yes		Significantly different (P < 0.05)?	No
												One- or two-tailed P value?	Two-tailed		One- or two-tailed P value?	Two-tailed		One- or two-tailed P value?	Two-tailed
												t, df	t=6,283, df=4		t, df	t=4,696, df=4		t, df	t=2,635, df=4
												How big is the difference?			How big is the difference?			How big is the difference?
												Mean of column B	6.546		Mean of column B	6.504		Mean of column B	6.504
												Mean of column C	15.23		Mean of column C	12.29		Mean of column C	11.2
												Difference between means (C - B) ± SEM	8,681 ± 1,382		Difference between means (C - B) ± SEM	5,782 ± 1,231		Difference between means (C - B) ± SEM	4,696 ± 1,782
												95% confidence interval	4,845 to 12,52		95% confidence interval	2,364 to 9,200		95% confidence interval	-0,2515 to 9,643
												R squared (eta squared)	0.908		R squared (eta squared)	0.8465		R squared (eta squared)	0.6345
												F test to compare variances			F test to compare variances			F test to compare variances
												F, DFn, Dfd	1,179, 2, 2		F, DFn, Dfd	1,105, 2, 2		F, DFn, Dfd	2,991, 2, 2
												P value	0.918		P value	0.9501		P value	0.5011
												P value summary	ns		P value summary	ns		P value summary	ns
												Significantly different (P < 0.05)?	No		Significantly different (P < 0.05)?	No		Significantly different (P < 0.05)?	No
												Data analyzed			Data analyzed			Data analyzed
												Sample size, column B	3		Sample size, column B	3		Sample size, column B	3
												Sample size, column C	3		Sample size, column C	3		Sample size, column C	3
												Table Analyzed	SKM-1 acetate CBX		Table Analyzed	Kasumi acetate CBX		Table Analyzed	HL-60acetate CBX
												Column F	MS-5 + SKM-1 CBX		Column F	MS-5 + Kasumi CBX		Column F	MS-5 + HL-60 CBX
												vs.	vs,		vs.	vs,		vs.	vs,
												Column D	SKM-1 only CBX		Column D	Kasumi only CBX		Column D	HL-60 only CBX
												Unpaired t test			Unpaired t test			Unpaired t test
												P value	0.0096		P value	0.0011		P value	<0,0001
												P value summary	**		P value summary	**		P value summary	****
												Significantly different (P < 0.05)?	Yes		Significantly different (P < 0.05)?	Yes		Significantly different (P < 0.05)?	Yes
												One- or two-tailed P value?	Two-tailed		One- or two-tailed P value?	Two-tailed		One- or two-tailed P value?	Two-tailed
												t, df	t=4,654, df=4		t, df	t=8,437, df=4		t, df	t=19,92, df=4
												How big is the difference?			How big is the difference?			How big is the difference?
												Mean of column D	0.9445		Mean of column D	0.935		Mean of column D	1.004
												Mean of column F	7.638		Mean of column F	8.994		Mean of column F	7.582
												Difference between means (F - D) ± SEM	6,694 ± 1,438		Difference between means (F - D) ± SEM	8,059 ± 0,9552		Difference between means (F - D) ± SEM	6,578 ± 0,3303
												95% confidence interval	2,701 to 10,69		95% confidence interval	5,407 to 10,71		95% confidence interval	5,661 to 7,495
												R squared (eta squared)	0.8441		R squared (eta squared)	0.9468		R squared (eta squared)	0.99
												F test to compare variances			F test to compare variances			F test to compare variances
												F, DFn, Dfd	22861, 2, 2		F, DFn, Dfd	3018, 2, 2		F, DFn, Dfd	980,5, 2, 2
												P value	<0,0001		P value	0.0007		P value	0.002
												P value summary	****		P value summary	***		P value summary	**
												Significantly different (P < 0.05)?	Yes		Significantly different (P < 0.05)?	Yes		Significantly different (P < 0.05)?	Yes
												Data analyzed			Data analyzed			Data analyzed
												Sample size, column D	3		Sample size, column D	3		Sample size, column D	3
												Sample size, column F	3		Sample size, column F	3		Sample size, column F	3
												Table Analyzed	SKM-1 acetate CBX		Table Analyzed	Kasumi acetate CBX		Table Analyzed	HL-60acetate CBX
												Column F	MS-5 + SKM-1 CBX		Column F	MS-5 + Kasumi CBX		Column F	MS-5 + HL-60 CBX
												vs.	vs,		vs.	vs,		vs.	vs,
												Column E	MS-5 only CBX		Column E	MS-5 only CBX		Column E	MS-5 only CBX
												Unpaired t test			Unpaired t test			Unpaired t test
												P value	0.5394		P value	0.1541		P value	0.3873
												P value summary	ns		P value summary	ns		P value summary	ns
												Significantly different (P < 0.05)?	No		Significantly different (P < 0.05)?	No		Significantly different (P < 0.05)?	No
												One- or two-tailed P value?	Two-tailed		One- or two-tailed P value?	Two-tailed		One- or two-tailed P value?	Two-tailed
												t, df	t=0,6703, df=4		t, df	t=1,755, df=4		t, df	t=0,9692, df=4
												How big is the difference?			How big is the difference?			How big is the difference?
												Mean of column E	6.504		Mean of column E	6.546		Mean of column E	6.546
												Mean of column F	7.638		Mean of column F	8.994		Mean of column F	7.582
												Difference between means (F - E) ± SEM	1,134 ± 1,692		Difference between means (F - E) ± SEM	2,447 ± 1,395		Difference between means (F - E) ± SEM	1,036 ± 1,069
												95% confidence interval	-3,564 to 5,833		95% confidence interval	-1,425 to 6,319		95% confidence interval	-1,931 to 4,002
												R squared (eta squared)	0.101		R squared (eta squared)	0.435		R squared (eta squared)	0.1902
												F test to compare variances			F test to compare variances			F test to compare variances
												F, DFn, Dfd	2,600, 2, 2		F, DFn, Dfd	1,132, 2, 2		F, DFn, Dfd	9,477, 2, 2
												P value	0.5556		P value	0.9379		P value	0.1909
												P value summary	ns		P value summary	ns		P value summary	ns
												Significantly different (P < 0.05)?	No		Significantly different (P < 0.05)?	No		Significantly different (P < 0.05)?	No
												Data analyzed			Data analyzed			Data analyzed
												Sample size, column E	3		Sample size, column E	3		Sample size, column E	3
												Sample size, column F	3		Sample size, column F	3		Sample size, column F	3

## Sheet: 5g
Survival in MLL-AF9 mouse model +/- TBHP +/- CBX
Source data
	Days	WT	Leukemic + Veh	Leuk + TBHP	Leuk + TBHP + CBX
0	86	0
2	86	0
3	86	0
4	86	0
5	86	0
13	78		1					Statistics
22	77		1					Comparison of Survival Curves	WT vs Leukemic + Veh			Comparison of Survival Curves	Leukemic + Veh vs Leuk + TBHP			Comparison of Survival Curves	Leuk + TBHP vs Leuk + TBHP + CBX			Comparison of Survival Curves	Leukemic + Veh vs Leuk + TBHP + CBX			Comparison of Survival Curves	WT vs Leuk + TBHP			Comparison of Survival Curves	WT vs Leuk + TBHP + CBX
30	86		0
41	86		0					Gehan-Breslow-Wilcoxon test				Gehan-Breslow-Wilcoxon test				Gehan-Breslow-Wilcoxon test				Gehan-Breslow-Wilcoxon test				Gehan-Breslow-Wilcoxon test				Gehan-Breslow-Wilcoxon test
51	78			1				Chi square	2.857			Chi square	3.891			Chi square	0.07143			Chi square	1.085			Chi square	8			Chi square	3.857
63	56			1				df	1			df	1			df	1			df	1			df	1			df	1
12	49			1				P value	0.091			P value	0.0485			P value	0.7893			P value	0.2976			P value	0.0047			P value	0.0495
60	49			1				P value summary	ns			P value summary	*			P value summary	ns			P value summary	ns			P value summary	**			P value summary	*
50	86				0			Are the survival curves sig different?	No			Are the survival curves sig different?	Yes			Are the survival curves sig different?	No			Are the survival curves sig different?	No			Are the survival curves sig different?	Yes			Are the survival curves sig different?	Yes
61	86				0
31	49				1			Median survival				Median survival				Median survival				Median survival				Median survival				Median survival
32	49				1			WT	Undefined			Leukemic + Veh	82			Leuk + TBHP	52.5			Leukemic + Veh	82			WT	Undefined			WT	Undefined
62	49				1			Leukemic + Veh	82			Leuk + TBHP	52.5			Leuk + TBHP + CBX	49			Leuk + TBHP + CBX	49			Leuk + TBHP	52.5			Leuk + TBHP + CBX	49
												Ratio (and its reciprocal)	1.562	0.6402		Ratio (and its reciprocal)	1.071	0.9333		Ratio (and its reciprocal)	1.673	0.5976
								Hazard Ratio (Mantel-Haenszel)	A/B	B/A		95% CI of ratio	0,2861 to 8,528	0,1173 to 3,496		95% CI of ratio	0,2398 to 4,787	0,2089 to 4,170		95% CI of ratio	0,2796 to 10,02	0,09985 to 3,576		Hazard Ratio (Mantel-Haenszel)	A/C	C/A		Hazard Ratio (Mantel-Haenszel)	A/D	D/A
								Ratio (and its reciprocal)	0.08604	11.62														Ratio (and its reciprocal)	0.03238	30.89		Ratio (and its reciprocal)	0.07643	13.08
								95% CI of ratio	0,005102 to 1,451	0,6891 to 196,0		Hazard Ratio (Mantel-Haenszel)	B/C	C/B		Hazard Ratio (Mantel-Haenszel)	C/D	D/C		Hazard Ratio (Mantel-Haenszel)	B/D	D/B		95% CI of ratio	0,003494 to 0,3000	3,333 to 286,2		95% CI of ratio	0,005871 to 0,9948	1,005 to 170,3
												Ratio (and its reciprocal)	0.1566	6.385		Ratio (and its reciprocal)	2.379	0.4203		Ratio (and its reciprocal)	0.5546	1.803
								Hazard Ratio (logrank)	A/B	B/A		95% CI of ratio	0,02335 to 1,050	0,9521 to 42,82		95% CI of ratio	0,3639 to 15,56	0,06427 to 2,748		95% CI of ratio	0,07947 to 3,870	0,2584 to 12,58		Hazard Ratio (logrank)	A/C	C/A		Hazard Ratio (logrank)	A/D	D/A
								Ratio (and its reciprocal)	0															Ratio (and its reciprocal)	0			Ratio (and its reciprocal)	0
								95% CI of ratio	-1,000 to -1,000	-1,000 to -1,000		Hazard Ratio (logrank)	B/C	C/B		Hazard Ratio (logrank)	C/D	D/C		Hazard Ratio (logrank)	B/D	D/B		95% CI of ratio	-1,000 to -1,000	-1,000 to -1,000		95% CI of ratio	-1,000 to -1,000	-1,000 to -1,000
												Ratio (and its reciprocal)	0.2563	3.902		Ratio (and its reciprocal)	1.721	0.581		Ratio (and its reciprocal)	0.6154	1.625
												95% CI of ratio	0,04727 to 1,390	0,7196 to 21,16		95% CI of ratio	0,3865 to 7,666	0,1305 to 2,587		95% CI of ratio	0,1065 to 3,557	0,2811 to 9,393

## Sheet: 5h
Monocytes in blood mouse model MLL-AF9 +/- TBHP +/-CBX
Source data							Statistics
Control	Leukemic	Leukemic + TBHP	Leukemic + TBHP + CBX
4.6	24.47	121.49	82.62				Table Analyzed	Mono #		Table Analyzed	Mono #		Table Analyzed	Mono #
1.04	54.83	110.24	53.91
4.78	3.55	124.81	11.35				Column B	Leukemic		Column C	Leukemic + TBHP		Column D	Leukemic + TBHP + CBX
1.6	5.72	144.66	24.76				vs.	vs,		vs.	vs,		vs.	vs,
6,6*			37.74				Column A	Control		Column B	Leukemic		Column C	Leukemic + TBHP
							Unpaired t test			Unpaired t test			Unpaired t test
							P value	0.1591		P value	0.0003		P value	0.001
							P value summary	ns		P value summary	***		P value summary	***
							Significantly different (P < 0.05)?	No		Significantly different (P < 0.05)?	Yes		Significantly different (P < 0.05)?	Yes
							One- or two-tailed P value?	Two-tailed		One- or two-tailed P value?	Two-tailed		One- or two-tailed P value?	Two-tailed
							t, df	t=1,607, df=6		t, df	t=7,442, df=6		t, df	t=5,423, df=7
							How big is the difference?			How big is the difference?			How big is the difference?
							Mean of column A	3.005		Mean of column B	22.14		Mean of column C	125.3
							Mean of column B	22.14		Mean of column C	125.3		Mean of column D	42.08
							Difference between means (B - A) ± SEM	19,14 ± 11,91		Difference between means (C - B) ± SEM	103,2 ± 13,86		Difference between means (D - C) ± SEM	-83,22 ± 15,35
							95% confidence interval	-9,993 to 48,27		95% confidence interval	69,24 to 137,1		95% confidence interval	-119,5 to -46,94
							R squared (eta squared)	0.301		R squared (eta squared)	0.9023		R squared (eta squared)	0.8078
							F test to compare variances			F test to compare variances			F test to compare variances
							F, DFn, Dfd	146,5, 3, 3		F, DFn, Dfd	2,741, 3, 3		F, DFn, Dfd	3,707, 4, 3
							P value	0.0019		P value	0.4297		P value	0.3103
							P value summary	**		P value summary	ns		P value summary	ns
							Significantly different (P < 0.05)?	Yes		Significantly different (P < 0.05)?	No		Significantly different (P < 0.05)?	No
							Data analyzed			Data analyzed			Data analyzed
							Sample size, column A	4		Sample size, column B	4		Sample size, column C	4
							Sample size, column B	4		Sample size, column C	4		Sample size, column D	5

## Sheet: 5i
Calcein-AM incorporation into AML cell lines treated with catalase prior to co-culture with MS-5
Source data
	SKM-1			Kasumi-1			HL-60
Control	1	1	1	1	1	1	1	1	1
500ug/ml catalase	0.474522	0.556983	0.518919	0.374172	0.374582	0.359322	0.314027	0.332258	0.387701
Statistics
Table Analyzed	AMLs + Catalase Calcein		Table Analyzed	AMLs + Catalase Calcein		Table Analyzed	AMLs + Catalase Calcein
Column B	SKM-1 catalase		Column D	Kasumi-1 catalase		Column F	HL-60 catalase
vs.	vs,		vs.	vs,		vs.	vs,
Column A	SKM-1 ctl		Column C	Kasumi-1 ctl		Column E	HL-60 ctl
Unpaired t test with Welch's correction			Unpaired t test with Welch's correction			Unpaired t test with Welch's correction
P value	0.0024		P value	<0,0001		P value	0.0011
P value summary	**		P value summary	****		P value summary	**
Significantly different (P < 0.05)?	Yes		Significantly different (P < 0.05)?	Yes		Significantly different (P < 0.05)?	Yes
One- or two-tailed P value?	Two-tailed		One- or two-tailed P value?	Two-tailed		One- or two-tailed P value?	Two-tailed
Welch-corrected t, df	t=20,28, df=2,000		Welch-corrected t, df	t=125,6, df=2,000		Welch-corrected t, df	t=29,58, df=2,000
How big is the difference?			How big is the difference?			How big is the difference?
Mean of column A	1		Mean of column C	1		Mean of column E	1
Mean of column B	0.5168		Mean of column D	0.3694		Mean of column F	0.3447
Difference between means (B - A) ± SEM	-0,4832 ± 0,02383		Difference between means (D - C) ± SEM	-0,6306 ± 0,005020		Difference between means (F - E) ± SEM	-0,6553 ± 0,02215
95% confidence interval	-0,5857 to -0,3807		95% confidence interval	-0,6522 to -0,6090		95% confidence interval	-0,7507 to -0,5600
R squared (eta squared)	0.9952		R squared (eta squared)	0.9999		R squared (eta squared)	0.9977
F test to compare variances			F test to compare variances			F test to compare variances
F, DFn, Dfd	Infinity, 2, 2		F, DFn, Dfd	Infinity, 2, 2		F, DFn, Dfd	Infinity, 2, 2
P value	<0,0001		P value	<0,0001		P value	<0,0001
P value summary	****		P value summary	****		P value summary	****
Significantly different (P < 0.05)?	Yes		Significantly different (P < 0.05)?	Yes		Significantly different (P < 0.05)?	Yes
Data analyzed			Data analyzed			Data analyzed
Sample size, column A	3		Sample size, column C	3		Sample size, column E	3
Sample size, column B	3		Sample size, column D	3		Sample size, column F	3
