# Supplementary figures and images for: Crosstalk between AML and stromal cells triggers acetate secretion through the metabolic rewiring of stromal cells
Source: eLife journal article supplement (doi:10.7554/elife.75908), 2022-09-02

Figure 2-Supplement Figure 1

A

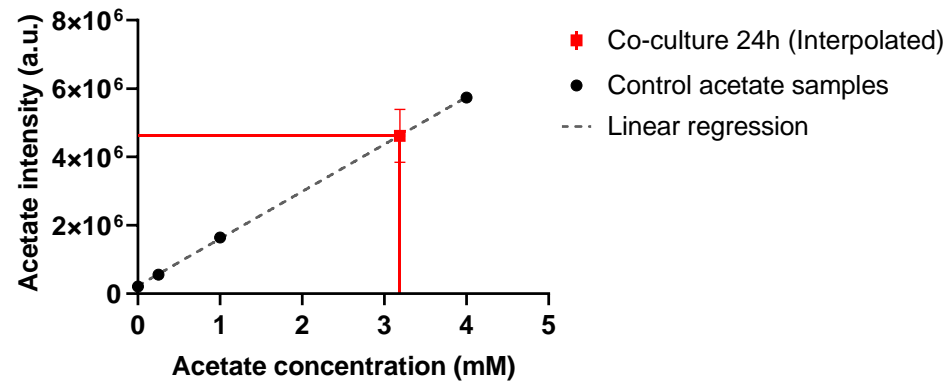

B

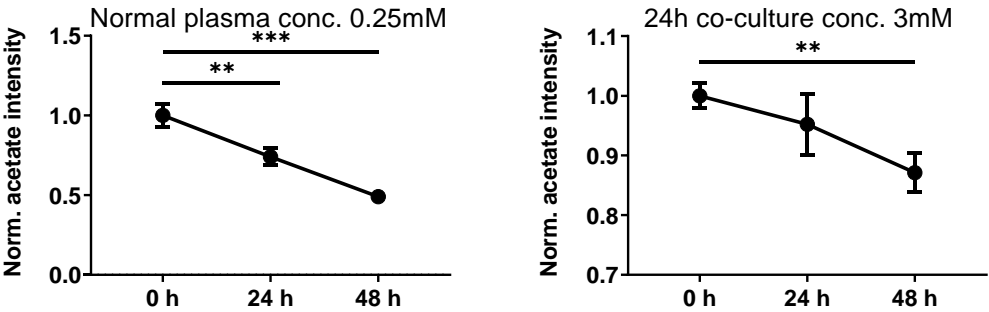

Supplement: supp [file elife-75908-supp-v1.zip]

A

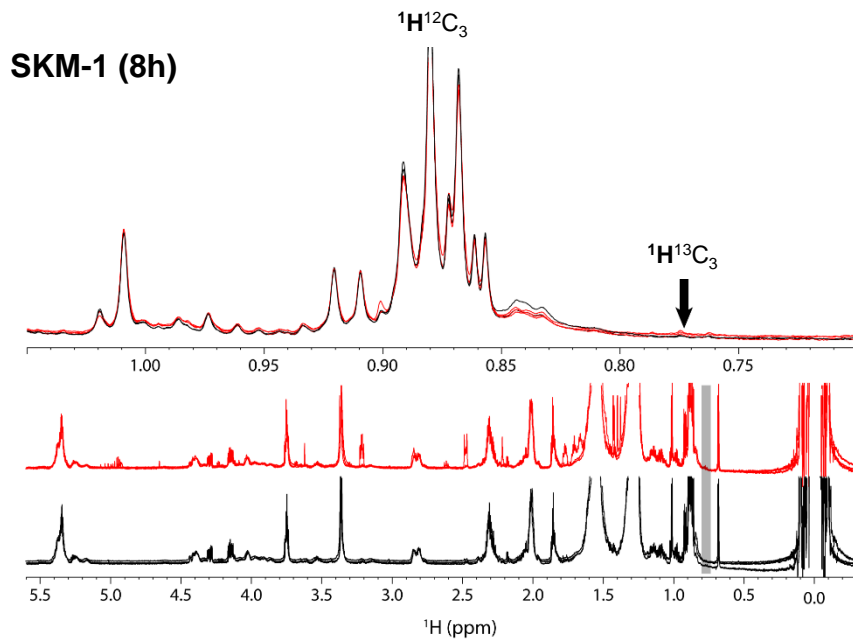

B

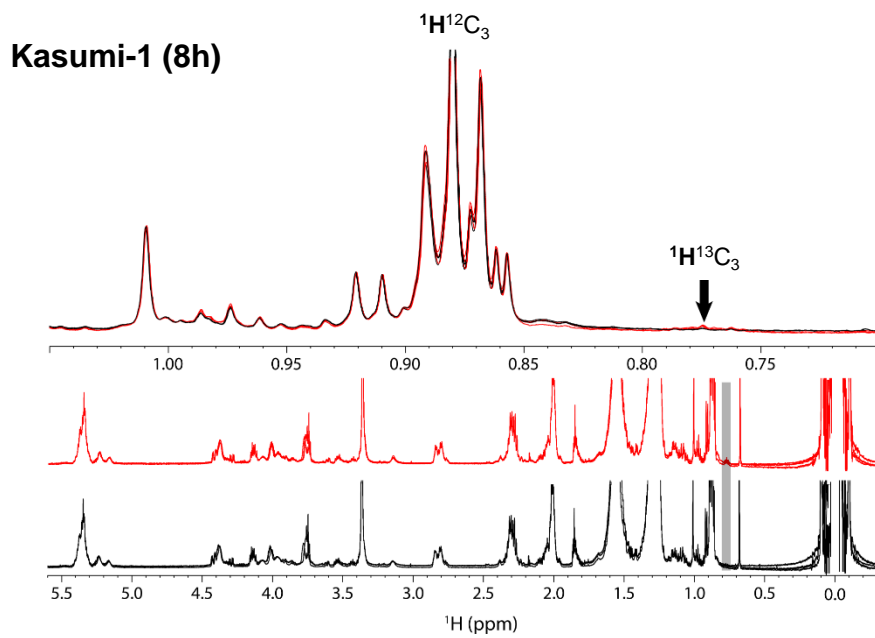

C

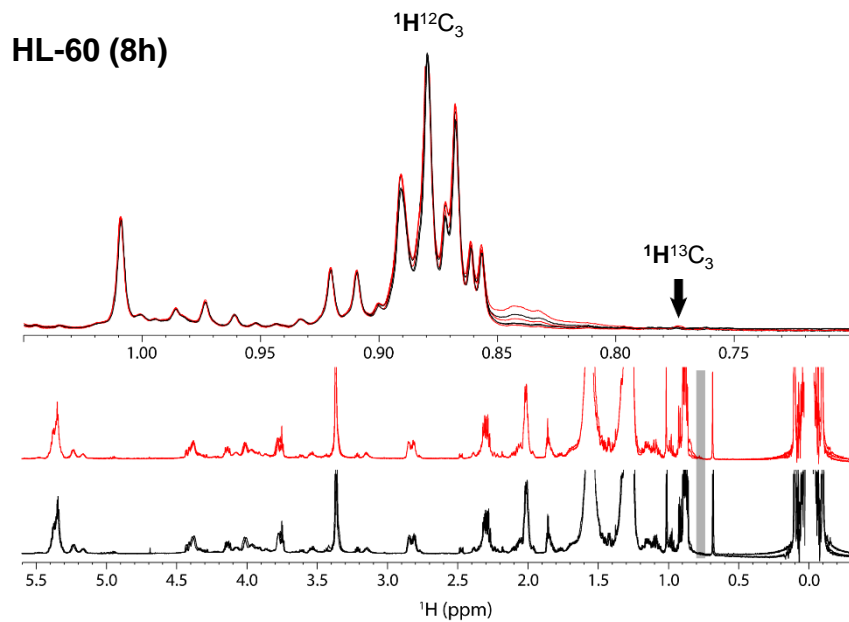

Supplement: supp [file elife-75908-supp-v1.zip]

Figure 1-Supplement Figure 2

A

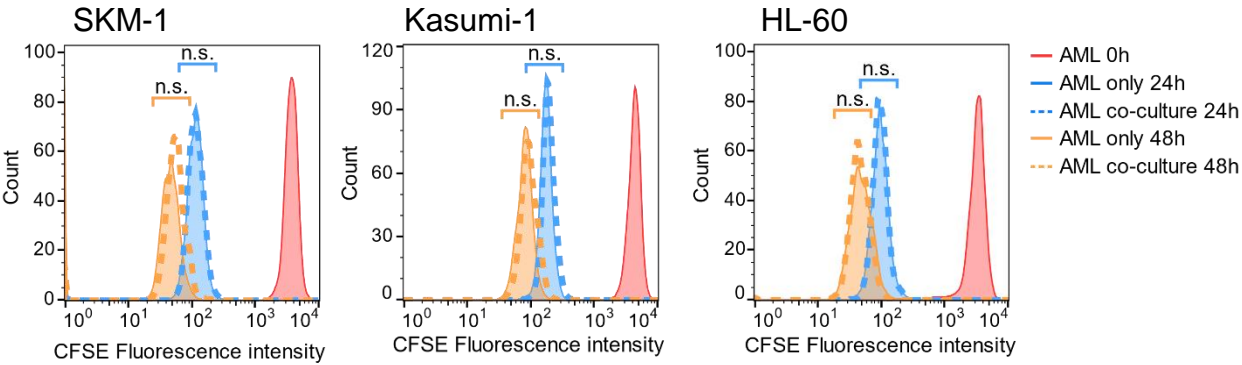

B

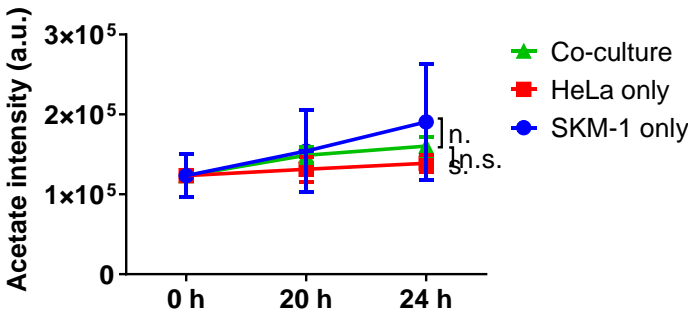

Supplement: supp [file elife-75908-supp-v1.zip]

Figure 4-Supplement Figure 1

A

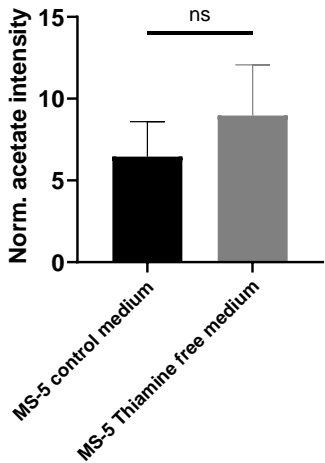

B

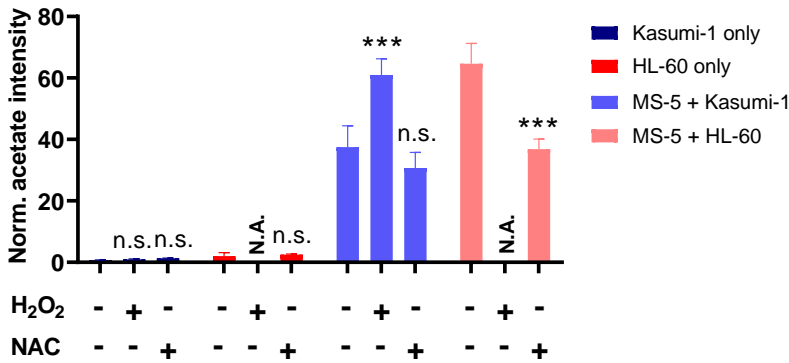

C

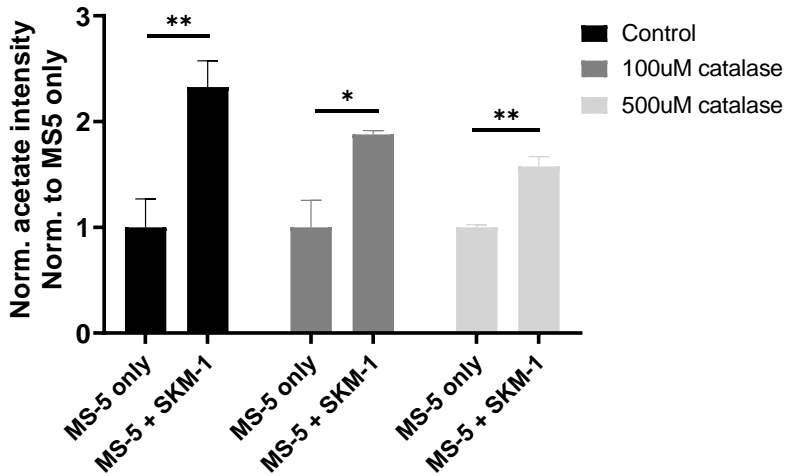

Supplement: supp [file elife-75908-supp-v1.zip]

Figure 1-Supplement Figure 1

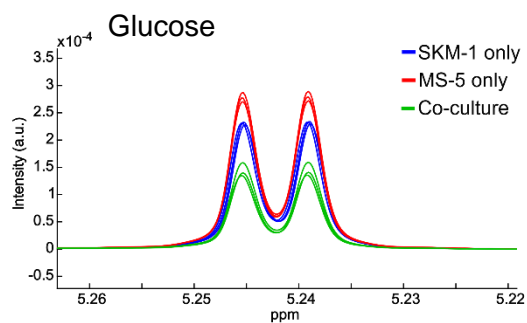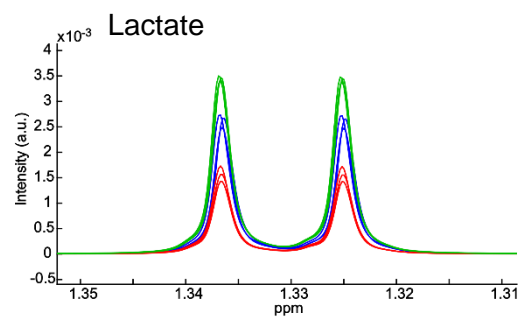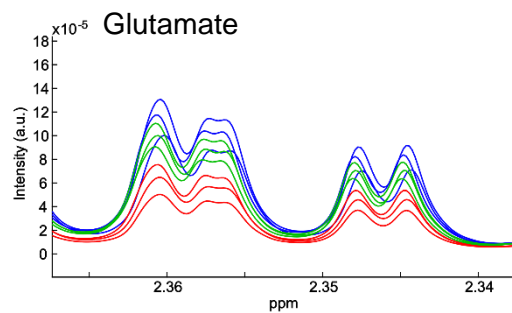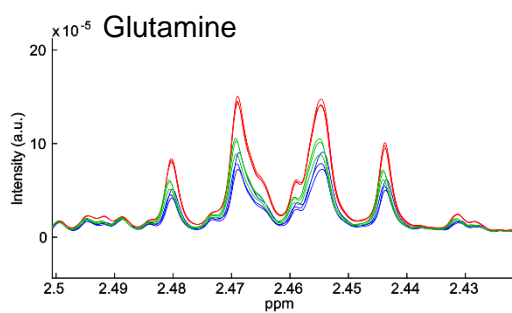

Supplement: supp [file elife-75908-supp-v1.zip]

A

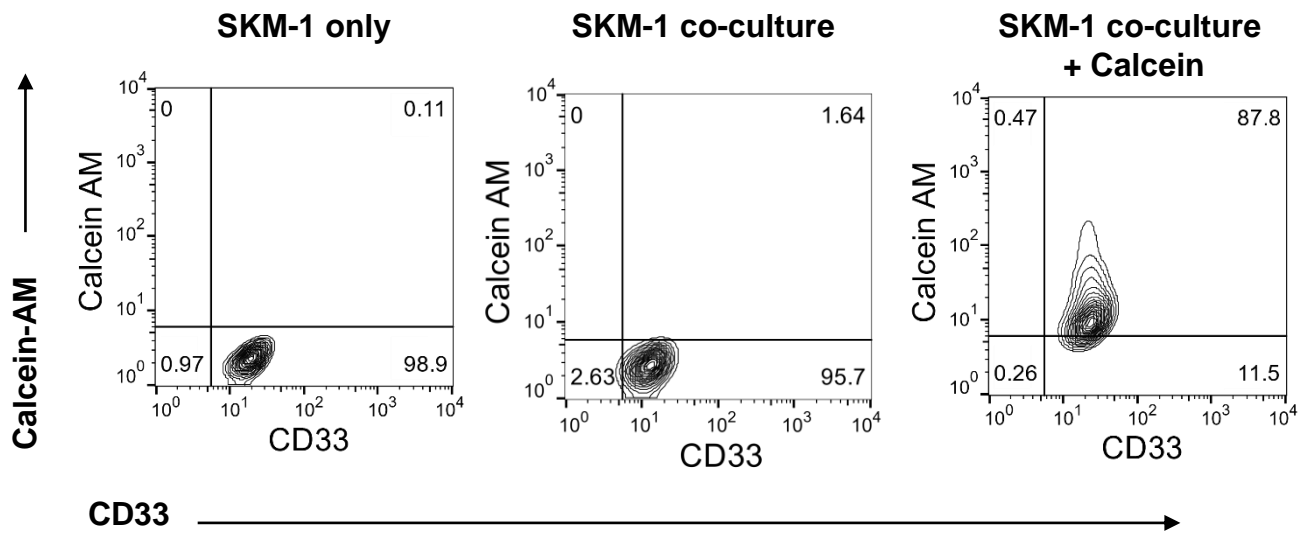

B

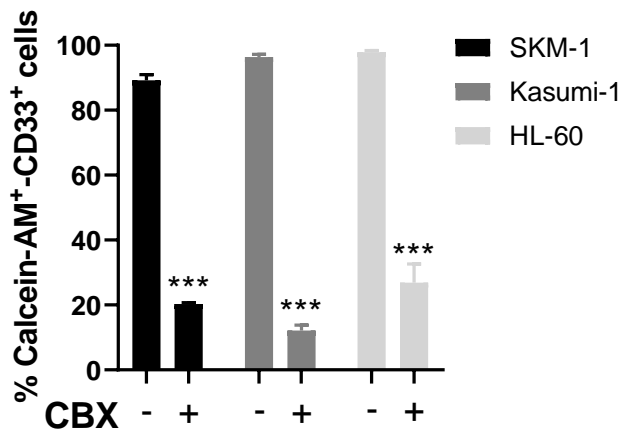

Supplement: supp [file elife-75908-supp-v1.zip]

A

Kasumi-1 (48h)

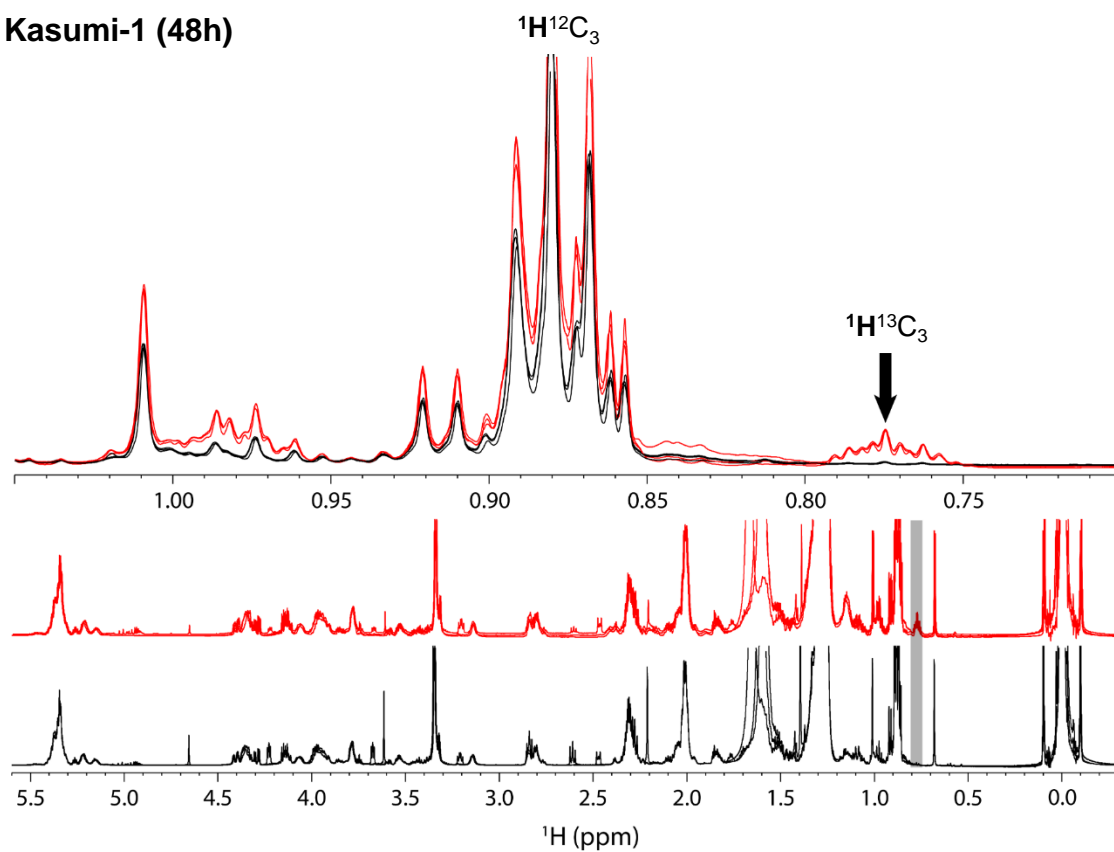

B

HL-60 (48h)

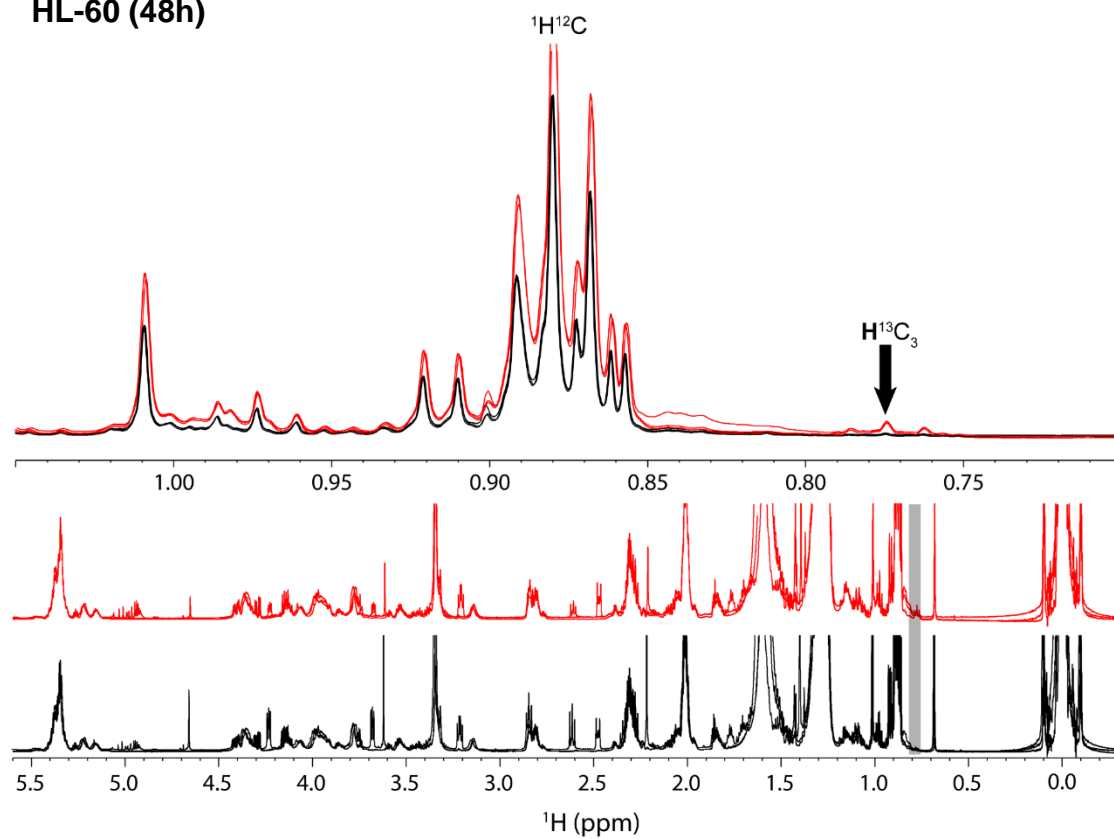

Supplement: supp [file elife-75908-supp-v1.zip]

Figure 2-Supplement Figure 5

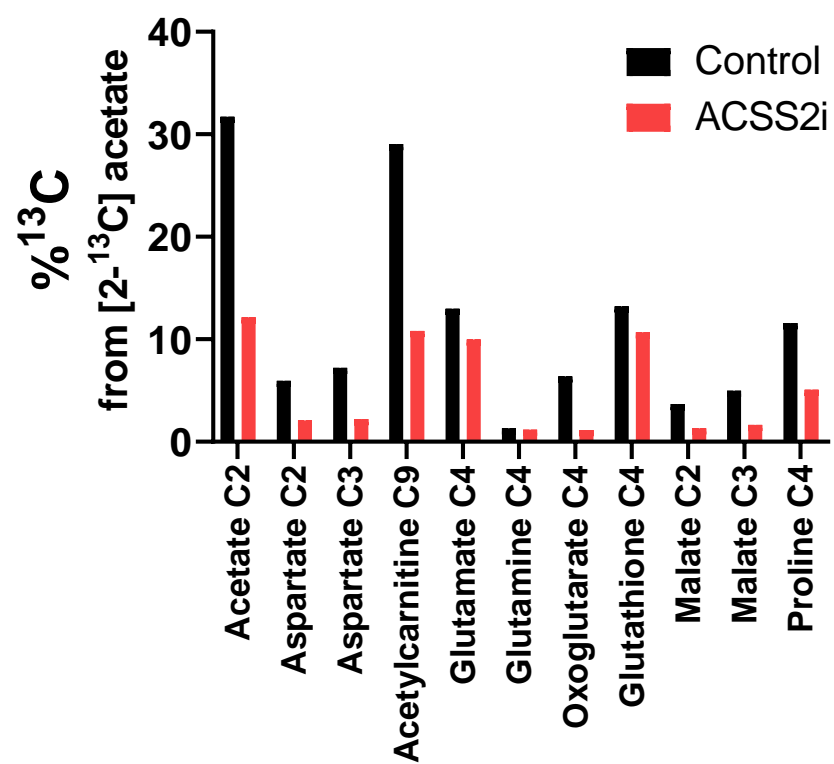

Supplement: supp [file elife-75908-supp-v1.zip]

Figure 3-Supplement Figure 1

A

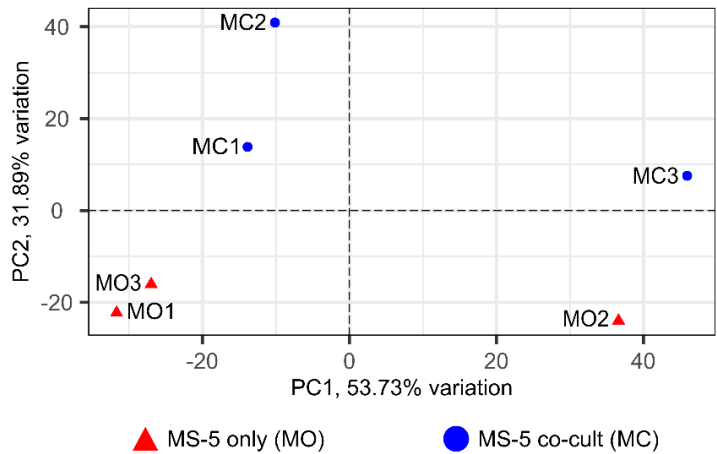

B

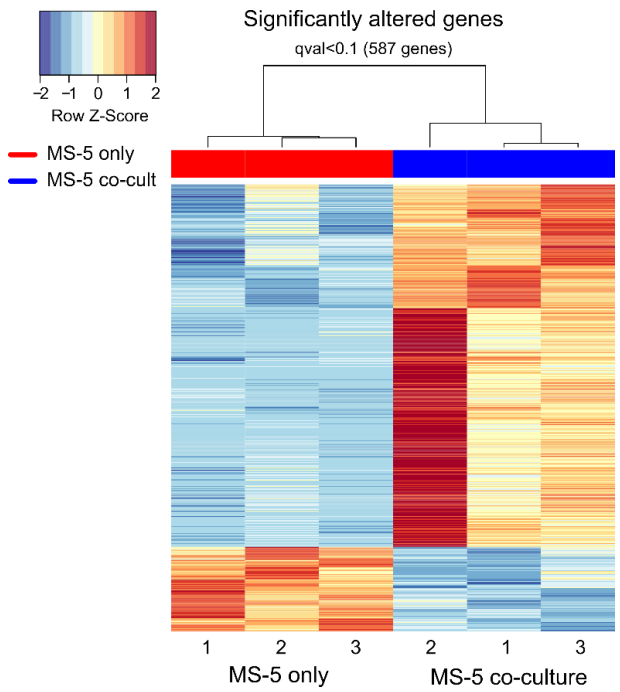

C

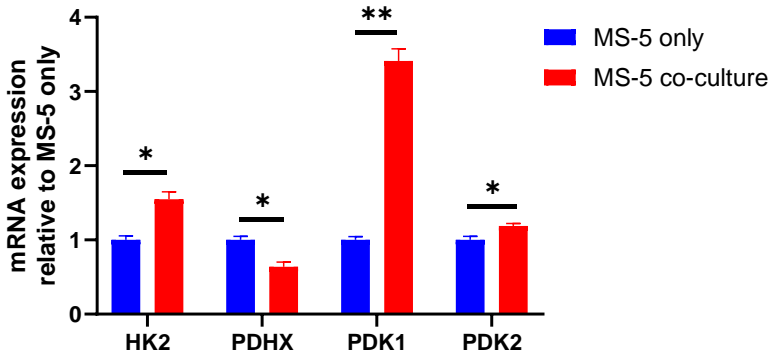

Supplement: supp [file elife-75908-supp-v1.zip]

Figure 2-Supplement Figure 2

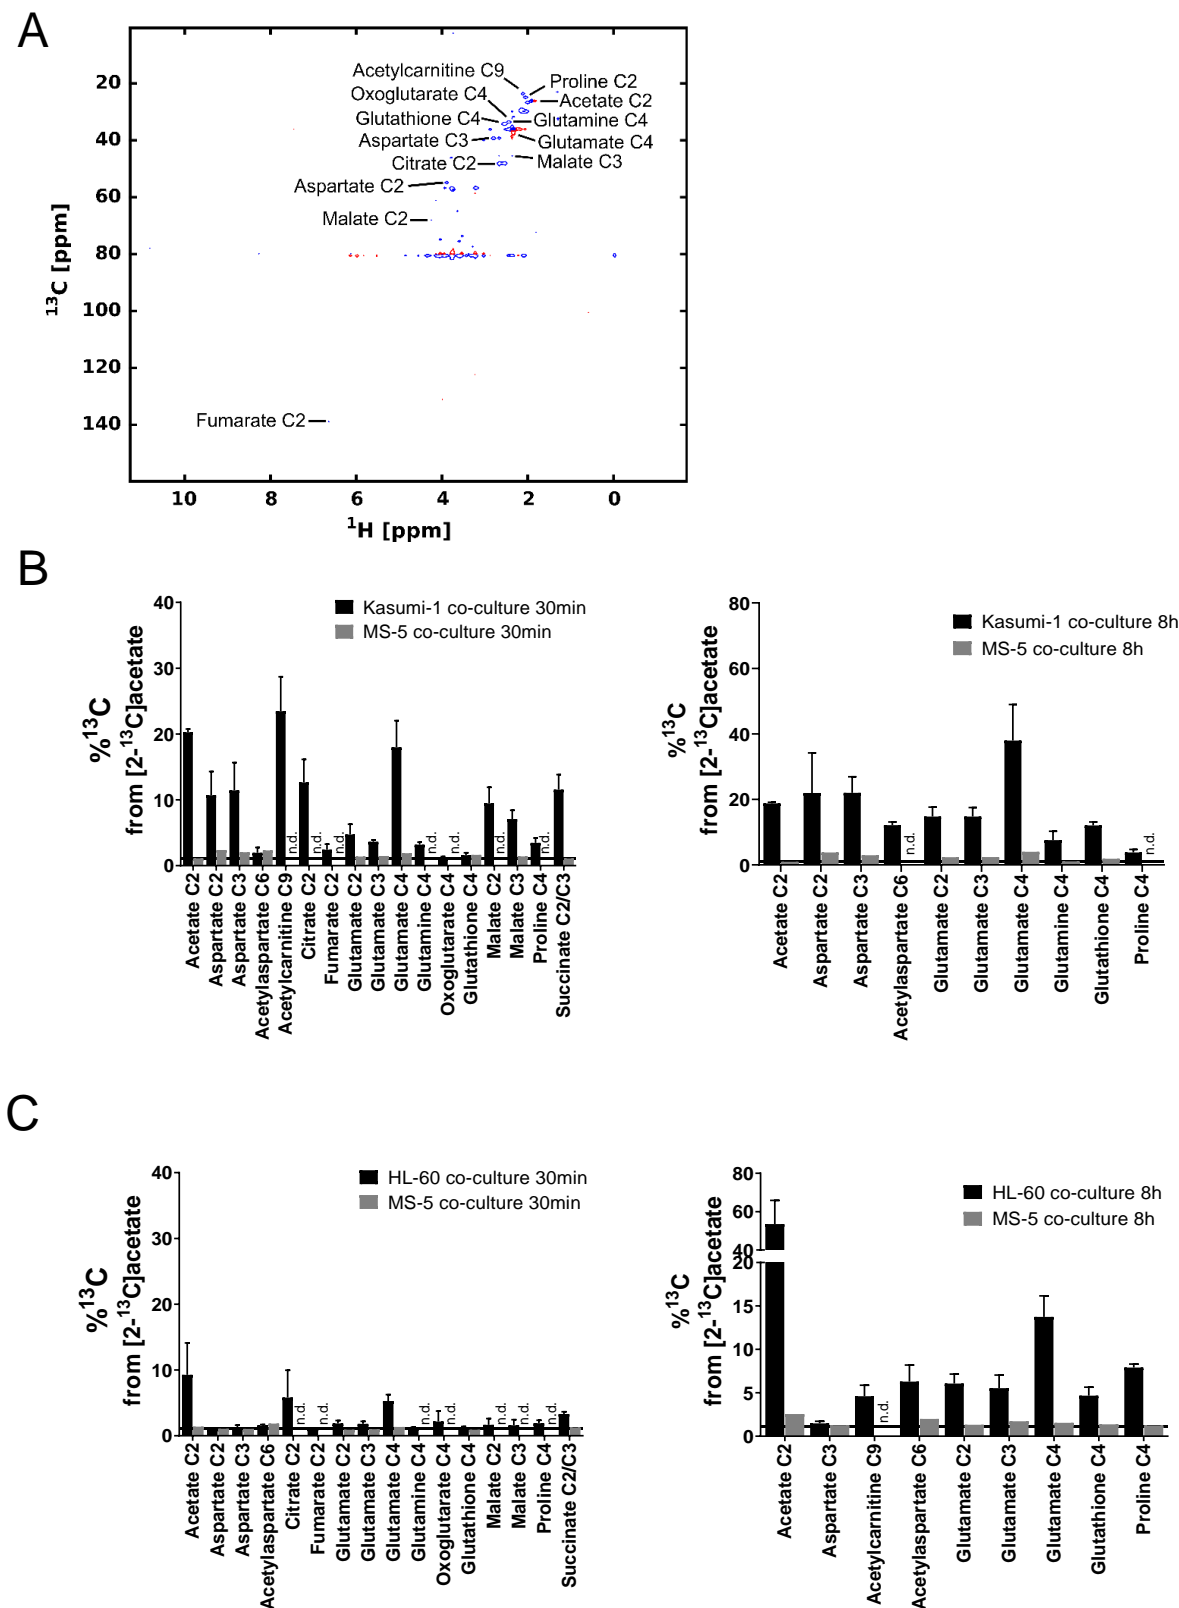

Supplement: supp [file elife-75908-supp-v1.zip]
